# Supplementary material for: Zfp57 Exerts Maternal and Sexually Dimorphic Effects on Genomic Imprinting
Source: PubMed Central journal article supplement (PMC8895500; doi:10.3389/fcell.2022.784128), 2022-02-02
Supplement: DataSheet1.pdf [file DataSheet1.pdf]

# **Zfp57 exerts maternal and sexually dimorphic effects on genomic imprinting**

Zhen Xu<sup>1,\*</sup>, Jiajia Shi<sup>1,\*</sup>, Yu Zhang<sup>2,\*</sup>, Yuhan Liu<sup>1</sup>, Junzheng Zhao<sup>1</sup>, Qian Chen<sup>1</sup>,  
Chenglin Song<sup>1</sup>, Shuhui Geng<sup>1</sup>, Wei Xie<sup>2</sup>, Feizhen Wu<sup>3</sup>, Yun Bai<sup>1</sup>, Yang Yang<sup>1</sup>,  
Xiajun Li<sup>1,\$</sup>

<sup>1</sup>School of Life Science and Technology, ShanghaiTech University, Shanghai 201210, China

<sup>2</sup>Center for Stem Cell Biology and Regenerative Medicine, MOE Key Laboratory of Bioinformatics, Tsinghua-Peking Center for Life Sciences, School of Life Sciences, Tsinghua University, Beijing 100084, China

<sup>3</sup>Institutes of Biomedical Sciences, Shanghai Medical College of Fudan University, Shanghai 200032, China

## Supplemental Figure Legends

### Figure S1. Statistical analysis was performed for DNA methylation at the imprinted

**regions comparing male embryos with female ones.** Genomic DNA samples were isolated from the *Zfp57<sup>+/-</sup>* ( $M^+Z^+$ ), *Zfp57<sup>+/-</sup>* ( $M^-Z^+$ ) and *Zfp57<sup>-/-</sup>* ( $M^-Z^-$ ) hybrid E13.5 embryos from the timed mating between *Zfp57<sup>+/-</sup>* (or *Zfp57<sup>-/-</sup>*) 129 female mice and *Zfp57<sup>+/-</sup>* (DBA\*) male mice mainly on the DBA/2J genetic background as reported in the previous study (12). Two female embryos of each genotype and two male embryos of each genotype were used for whole-genome bisulfite sequencing (WGBS) analysis. Two-tailed Student's t-test was used to compare DNA methylation at all known 24 ICRs of the same genotype ( $M^+Z^+$ ,  $M^-Z^+$ ,  $M^-Z^-$ ) between the female (light grey) samples and male (dark grey) samples (A-C). One-way ANOVA (Fisher LSD) was used for statistical analysis of DNA methylation at each ICR of different genotypes in the same gender (D-D', E-E'). The DNA methylation data were plotted as mean  $\pm$  SEM in the bar graphs. Statistical significance: \*,  $p < 0.05$ . \*\*,  $p < 0.01$ .

(A) DNA methylation was compared at all known 24 ICRs between female and male  $M^+Z^+$  embryos.

(B) DNA methylation was compared at all known 24 ICRs between female and male  $M^-Z^+$  embryos.

(C) DNA methylation was compared at all known 24 ICRs between female and male  $M^-Z^-$  embryos.

(D) Statistical analysis was carried out for DNA methylation at the *Peg13*, *Rasgrf1* and *AK008011* ICRs in the female  $M^+Z^+$ ,  $M^-Z^+$  and  $M^-Z^-$  embryos. DNA methylation was significantly reduced at the *AK008011* ICR in the female  $M^-Z^+$  and  $M^-Z^-$  embryos compared with the female  $M^+Z^+$  embryos. DNA methylation was close to significantly reduced ( $p = 0.05$ ) at the *Peg13* ICR in the female  $M^-Z^-$  embryos compared with the female  $M^+Z^+$  embryos.

(D') Statistical analysis was carried out for DNA methylation at the *Peg13*, *Rasgrf1* and *AK008011* ICRs in the male  $M^+Z^+$ ,  $M^-Z^+$  and  $M^-Z^-$  embryos. DNA methylation was

significantly reduced at the *Peg13* and *Rasgrf1* ICRs in the male M<sup>-</sup>Z<sup>-</sup> embryos compared with the male M<sup>+</sup>Z<sup>+</sup> and M<sup>-</sup>Z<sup>+</sup> embryos. DNA methylation was close to significantly reduced at the *AK008011* ICR in the male M<sup>-</sup>Z<sup>+</sup> (p= 0.09) and M<sup>-</sup>Z<sup>-</sup> embryos (p= 0.06) compared with the male M<sup>+</sup>Z<sup>+</sup> embryos.

(E) Statistical analysis results were shown for DNA methylation at the *Snrpn*, *Impact* and *Cdh15* ICRs in the female M<sup>+</sup>Z<sup>+</sup>, M<sup>-</sup>Z<sup>+</sup> and M<sup>-</sup>Z<sup>-</sup> embryos. DNA methylation was significantly reduced at these three ICRs in the female M<sup>-</sup>Z<sup>+</sup> and M<sup>-</sup>Z<sup>-</sup> embryos compared with the female M<sup>+</sup>Z<sup>+</sup> embryos. It was significantly reduced at the *Cdh15* ICR and close to significantly reduced (p= 0.05) at the *Snrpn* ICR in the female M<sup>-</sup>Z<sup>-</sup> embryos compared with the female M<sup>+</sup>Z<sup>+</sup> embryos.

(E') Statistical analysis results were shown for DNA methylation at the *Snrpn*, *Impact* and *Cdh15* ICRs in the male M<sup>+</sup>Z<sup>+</sup>, M<sup>-</sup>Z<sup>+</sup> and M<sup>-</sup>Z<sup>-</sup> embryos. DNA methylation was significantly reduced at these three ICRs in the male M<sup>-</sup>Z<sup>-</sup> embryos compared with the male M<sup>+</sup>Z<sup>+</sup> embryos. It was significantly reduced at the *Snrpn* and *Impact* ICRs in the male M<sup>-</sup>Z<sup>-</sup> embryos compared with the male M<sup>-</sup>Z<sup>+</sup> embryos. It was also close to significantly reduced (p= 0.05) at the *Snrpn* ICR in the male M<sup>-</sup>Z<sup>+</sup> embryos compared with the male M<sup>+</sup>Z<sup>+</sup> embryos.

**Figure S2. DNA methylation imprint was similarly lost in female and male *Zfp57* maternal-zygotic mutant embryos at most imprinted regions as exemplified by three ICRs here.** The methylation IGV plot, with the same scale (0-1), is shown for the *Inpp5f*, *Zac1* and IG-DMR ICRs in two female embryos (E1, E2) or two male embryos (E1, E2) for each of the M<sup>+</sup>Z<sup>+</sup>, M<sup>-</sup>Z<sup>+</sup> and M<sup>-</sup>Z<sup>-</sup> genotypes.

(A) The methylation IGV plot of *Inpp5f* ICR (mm9, chr7:135831788-135832156) in the female embryos.

(A') The methylation IGV plot of *Inpp5f* ICR (mm9, chr7:135831788-135832156) in the male embryos.

(B) The methylation IGV plot of *Zac1* ICR (mm9, chr10:12810119-12811967) in the female embryos.

(B') The methylation IGV plot of *Zac1* ICR (mm9, chr10:12810119-12811967) in the male embryos.

(C) The methylation IGV plot of the IG-DMR (mm9, chr12:110764950-110766944) of the *Dlk1-Dio3* imprinted region in the female embryos.

(C') The methylation IGV plot of the IG-DMR (mm9, chr12:110764950-110766944) of the *Dlk1-Dio3* imprinted region in the male embryos.

**Figure S3. Maternal effect of *Zfp57* was observed on maintenance of ICR methylation at the *Snrpn* and *Impact* imprinted regions on the allelic methylation IGV plot.**

After WGBS analysis of the *Zfp57*<sup>+/+</sup> (M<sup>+</sup>Z<sup>+</sup>), *Zfp57*<sup>+/-</sup> (M<sup>-</sup>Z<sup>+</sup>) and *Zfp57*<sup>-/-</sup> (M<sup>-</sup>Z<sup>-</sup>) hybrid 129/DBA embryos, the allelic methylation IGV plots are generated for the *Snrpn* and *Impact* ICRs on the paternal (P) or maternal (M) chromosome in two female embryos (E1, E2) or two male embryos (E1, E2) of each genotype. DNA methylation imprint on the maternal chromosome for these two ICRs was partially lost in the M<sup>-</sup>Z<sup>+</sup> embryos, although more severe loss of ICR methylation was observed in the M<sup>-</sup>Z<sup>-</sup> embryos. The scale (0-1) is the same for all IGV plots in the figure.

(A, A') The allelic methylation IGV plot of the *Snrpn* ICR (mm9, chr7:67148026-67150181) in the female (A) or male (A') embryos.

(B, B') The allelic methylation IGV plot of the *Impact* ICR (mm9, chr18:13131377-13131664) in the female (B) or male (B') embryos.

**Figure S4. Parent-of-origin-dependent expression of a few imprinted genes was differentially affected in the female or male embryos lacking maternal *Zfp57*.**

Total RNA samples were isolated from 129/DBA hybrid female M<sup>+</sup>Z<sup>+</sup>, M<sup>-</sup>Z<sup>+</sup> and M<sup>-</sup>Z<sup>-</sup> or male M<sup>+</sup>Z<sup>+</sup>, M<sup>-</sup>Z<sup>+</sup> and M<sup>-</sup>Z<sup>-</sup> E13.5 embryos derived from the timed mating between *Zfp57*<sup>+/-</sup> (or *Zfp57*<sup>-/-</sup>) 129 female mice and *Zfp57*<sup>+/-</sup> DBA\* male mice, similar to the previous study (12). Then RNA-seq analysis was performed for at least three female embryos of each genotype and three male embryos of each genotype (M<sup>+</sup>Z<sup>+</sup>, M<sup>-</sup>Z<sup>+</sup> and M<sup>-</sup>Z<sup>-</sup>). The SNPs present in the exons of



the imprinted genes were employed to determine the allelic expression of the corresponding imprinted genes. P-score was used to calculate expression of the paternal alleles of the imprinted genes (Table S3-S4), which is described in the Materials and Methods section. Then the data plotted as mean  $\pm$  SEM were analyzed by two-way ANOVA (A-A') or one-way ANOVA (B-B', C-C', D-D') to test the statistical significance: \*,  $p < 0.05$ . \*\*,  $p < 0.01$ . \*\*\*,  $p < 0.001$ .

(A, A') Expression of the paternal alleles of *Zim1* and *Usp29* at the *Peg3* imprinted region in the female (A) or male (A') embryos.

(B, B') Expression of the paternal allele of the *Zdbf2* imprinted gene at the *Gpr1-Zdbf2* imprinted region in the female (B) or male (B') embryos.

(C, C') Expression of the paternal allele of *Nnat* (*Peg5*) at the *Peg5/Nnat* imprinted region in the female (C) or male (C') embryos.

(D, D') Expression of the paternal allele of the *H13* imprinted gene at the *Mcts2* imprinted region in the female (D) or male (D') embryos.

**Figure S5. Maternal effect of *Zfp57* was observed on expression of the imprinted genes at the *Snrpn* imprinted region.** RNA-seq analysis was carried out for at least three female embryos and three male embryos of each genotype ( $M^+Z^+$ ,  $M^-Z^+$  and  $M^-Z^-$ ). The fold change (FC) in the  $\text{Log}_2$  scale ( $\text{Log}_2\text{FC}$ ) was used to measure relative expression levels of the imprinted genes in the  $M^+Z^+$ ,  $M^-Z^+$  and  $M^-Z^-$  embryos based on the TPM values (Table S5-S6). Then the expression level differences were analyzed by two-way (A-A') or one-way (B-B', C-C') ANOVA to test the statistical significance. The  $\text{Log}_2\text{FC}$  data were plotted as mean  $\pm$  SEM in the bar graphs. Statistical significance: \*,  $p < 0.05$ . \*\*,  $p < 0.01$ . \*\*\*,  $p < 0.001$ .

(A, A') Expression of the imprinted genes at the *Snrpn* imprinted region in the female embryos (A) or male embryos (A'). These include the *Atp10a*, *Ube3a*, *Snord64*, *Snrpn*, *Snurf*, *Ndn*, *Ipw*, *Magel2*, *Mkrn3* and *Peg12* imprinted genes at the *Snrpn* imprinted region.

(B, B') Expression of *Impact* in the female embryos (B) or male embryos (B').

(C, C') Expression of *Cdh15* in the female embryos (C) or male embryos (C').

**Figure S6. Expression of the imprinted genes at the *Peg13* imprinted region.** Total RNA samples were isolated from M<sup>+</sup>Z<sup>+</sup>, M<sup>-</sup>Z<sup>+</sup> and M<sup>-</sup>Z<sup>-</sup> hybrid E13.5 embryos derived from the timed mating between *Zfp57*<sup>+/-</sup> (or *Zfp57*<sup>-/-</sup>) 129 female mice and *Zfp57*<sup>+/-</sup> DBA\* male mice. RNA-seq analysis was performed for at least three female embryos or three male embryos of each genotype (M<sup>+</sup>Z<sup>+</sup>, M<sup>-</sup>Z<sup>+</sup> and M<sup>-</sup>Z<sup>-</sup>). The SNPs present in the exons of the imprinted genes were employed to determine the allelic expression of the corresponding imprinted genes. P-score described in Materials and Methods was used to calculate expression of the paternal alleles of the *Kcnk9*, *Peg13* and *Trappc9* imprinted genes at the *Peg13* imprinted region in the M<sup>+</sup>Z<sup>+</sup>, M<sup>-</sup>Z<sup>+</sup> and M<sup>-</sup>Z<sup>-</sup> embryos of the same gender (Table S3-S4), whereas Log<sub>2</sub>FC was used to measure relative expression levels of these imprinted genes in the M<sup>+</sup>Z<sup>+</sup>, M<sup>-</sup>Z<sup>+</sup> and M<sup>-</sup>Z<sup>-</sup> embryos of the same gender based on the TPM values (Table S5-S6). Then the data were analyzed by two-way ANOVA (A-A', B-B') or two-tailed Student's t-test (C) to test the statistical significance. The P-score and Log<sub>2</sub>FC data were plotted as mean ± SEM in the bar graphs. Statistical significance: \*, p < 0.05. \*\*, p < 0.01. \*\*\*, p < 0.001.

(A, A') Expression of the paternal alleles of *Kcnk9*, *Peg13* and *Trappc9* in the female (A) or male (A') embryos.

(B, B') Expression of *Kcnk9*, *Peg13* and *Trappc9* in the female (B) or male (B') embryos.

(C) Two-tailed Student's t-test was carried out to compare expression of *Kcnk9* in the female M<sup>+</sup>Z<sup>+</sup>, M<sup>-</sup>Z<sup>+</sup> and M<sup>-</sup>Z<sup>-</sup> embryos with its expression in the male M<sup>+</sup>Z<sup>+</sup>, M<sup>-</sup>Z<sup>+</sup> and M<sup>-</sup>Z<sup>-</sup> embryos of the same genotype. f, female embryos. m, male embryos.

**Figure S7. Parent-of-origin-dependent expression was similarly lost for the imprinted genes at three imprinted regions in female or male *Zfp57* maternal-zygotic mutant embryos.** RNA-seq analysis was performed for female and male M<sup>+</sup>Z<sup>+</sup>, M<sup>-</sup>Z<sup>+</sup> and M<sup>-</sup>Z<sup>-</sup> hybrid E13.5 embryos derived from the timed mating between *Zfp57*<sup>+/-</sup> (or *Zfp57*<sup>-/-</sup>) 129 female mice and *Zfp57*<sup>+/-</sup> DBA\* male mice. At least three female embryos and three male embryos of

each genotype ( $M^+Z^+$ ,  $M^-Z^+$  and  $M^-Z^-$ ) were used for RNA-seq analysis to examine allelic expression of the imprinted genes at the *Inpp5f*, *Zac1* and *Dlk1-Dio3* imprinted regions. P-score was used to calculate expression of the paternal alleles of the imprinted genes (Table S3-S4). Then the data plotted as mean  $\pm$  SEM were analyzed by one-way ANOVA (A-A') or two-way ANOVA (B-B', C-C') to test the statistical significance: \*,  $p < 0.05$ . \*\*,  $p < 0.01$ . \*\*\*,  $p < 0.001$ .

(A, A') Expression of the paternal allele of *Inpp5f* at the *Inpp5f* imprinted region in the female (A) or male (A') embryos.

(B, B') Expression of the paternal alleles of *Zac1* (*Plagl1*), *Hymai* and *Phactr2* at the *Zac1* imprinted region in the female (B) or male (B') embryos.

(C, C') Expression of the paternal alleles of *Begain*, *Dio3os*, *Dlk1*, *Rian*, and *Meg3* at the *Dlk1-Dio3* imprinted region in the female (C) or male (C') embryos.

**Figure S8. Sexually dimorphic effect was observed on expression of some imprinted genes in the absence of *Zfp57* or without just maternal *Zfp57* in mouse embryos.** Total RNA samples were isolated from  $M^+Z^+$ ,  $M^-Z^+$  and  $M^-Z^-$  hybrid E13.5 embryos derived from the timed mating between *Zfp57*<sup>+/-</sup> (or *Zfp57*<sup>-/-</sup>) 129 female mice and *Zfp57*<sup>+/-</sup> DBA\* male mice. RNA-seq analysis was performed for at least three female embryos or three male embryos of each genotype ( $M^+Z^+$ ,  $M^-Z^+$  and  $M^-Z^-$ ). Log<sub>2</sub>FC described in Materials and Methods was used to measure relative expression levels of the imprinted genes in the  $M^+Z^+$ ,  $M^-Z^+$  and  $M^-Z^-$  embryos of the same gender (A-A', B-B') or between the female and male embryos of the same genotype (C-D) based on the TPM values (Table S5-S6). Then the Log<sub>2</sub>FC data plotted as mean  $\pm$  SEM in the bar graphs were analyzed by two-way ANOVA (A-A', B-B', C-C') or one-way ANOVA (D-D') to test the statistical significance: \*,  $p < 0.05$ . \*\*,  $p < 0.01$ . \*\*\*,  $p < 0.001$ .

(A, A') Expression of *Zrsr1* and *Commd1* at the *Zrsr1* imprinted region in the female (A) or male (A') embryos.

(B, B') Expression of *Igf2r* and *Slc22a3* at the *Igf2r* imprinted region in the female (B) or male (B') embryos.

(C, C') Expression of *Ascl2* and *Th* at the *Kcnq1ot1* imprinted region in the female (C) or male (C') embryos.

(D, D') Expression of *Calcr* at the *Peg10* imprinted region in the female (D) or male (D') embryos.

**Figure S9. Expression of the imprinted genes at the *Dlk1-Dio3* imprinted region.** Total RNA samples were isolated from  $M^+Z^+$ ,  $M^-Z^+$  and  $M^-Z^-$  hybrid E13.5 embryos derived from the timed mating between *Zfp57*<sup>+/-</sup> (or *Zfp57*<sup>-/-</sup>) 129 female mice and *Zfp57*<sup>+/-</sup> DBA\* male mice. RNA-seq analysis was performed for at least three female embryos or three male embryos of each genotype ( $M^+Z^+$ ,  $M^-Z^+$  and  $M^-Z^-$ ). Log<sub>2</sub>FC described in Materials and Methods was used to measure relative expression levels of the imprinted genes at the *Dlk1-Dio3* imprinted region in the  $M^+Z^+$ ,  $M^-Z^+$  and  $M^-Z^-$  embryos of the same gender based on the TPM values (Table S5-S6). Then the data plotted as mean ± SEM in the bar graphs were analyzed by two-way ANOVA to test the statistical significance: \*, p < 0.05. \*\*, p < 0.01. \*\*\*, p < 0.001.

(A, A') Expression of *Begain*, *Dio3*, *Dio3os*, *Dlk1*, *Rian*, *Rtl1*, *AF357359*, *Meg3*, *Mirg*, *AF357355*, *AF357425*, *Mir410*, *Mir431* and *Mir335* at the *Dlk1-Dio3* imprinted region in the female (A) or male (A') embryos.

**Figure S10. Expression of most imprinted genes was similarly affected in female or male *Zfp57* maternal-zygotic mutant embryos.** Total RNA samples were isolated from  $M^+Z^+$ ,  $M^-Z^+$  and  $M^-Z^-$  hybrid E13.5 embryos derived from the timed mating between *Zfp57*<sup>+/-</sup> (or *Zfp57*<sup>-/-</sup>) 129 female mice and *Zfp57*<sup>+/-</sup> DBA\* male mice. RNA-seq analysis was performed for at least three female embryos or three male embryos of each genotype ( $M^+Z^+$ ,  $M^-Z^+$  and  $M^-Z^-$ ). Log<sub>2</sub>FC described in Materials and Methods was used to measure relative expression levels of the imprinted genes in the  $M^+Z^+$ ,  $M^-Z^+$  and  $M^-Z^-$  embryos of the same gender based on the TPM values (Table S5-S6). Then the data plotted as mean ± SEM in the bar graphs

were analyzed by two-way ANOVA (A-A', C-C', D-D') or one-way ANOVA (B-B') to test the statistical significance: \*,  $p < 0.05$ . \*\*,  $p < 0.01$ . \*\*\*,  $p < 0.001$ .

(A, A') Expression of *Zim1*, *Usp29*, *Peg3* and *Peg3os* at the *Peg3* imprinted region in the female (A) or male (A') embryos.

(B, B') Expression of *Inpp5f* at the *Inpp5f* imprinted region in the female (B) or male (B') embryos.

(C, C') Expression of *Zac1* (*Plagl1*), *Hymai* and *Phactr2* at the *Zac1* imprinted region in the female (C) or male (C') embryos.

(D, D') Expression of *Nnat* (*Peg5*) and *Blcap* at the *Peg5* imprinted region in the female (D) or male (D') embryos.

**Figure S11. Expression of the *Xlr3b* imprinted gene was increased in the male *Zfp57* maternal-zygotic mutant embryos but not in the female mutant embryos.**

Total RNA samples were isolated from  $M^+Z^+$ ,  $M^-Z^+$  and  $M^-Z^-$  hybrid E13.5 embryos derived from the timed mating between *Zfp57*<sup>+/-</sup> (or *Zfp57*<sup>-/-</sup>) 129 female mice and *Zfp57*<sup>+/-</sup> DBA\* male mice. RNA-seq analysis was performed for at least three female embryos or three male embryos of each genotype ( $M^+Z^+$ ,  $M^-Z^+$  and  $M^-Z^-$  indicated by red, blue and grey bars, respectively). Log<sub>2</sub>FC described in Materials and Methods was used to measure relative expression levels of the imprinted genes in the  $M^+Z^+$ ,  $M^-Z^+$  and  $M^-Z^-$  embryos of the same gender based on the TPM values (Table S5-S6). Then the data plotted as mean  $\pm$  SEM in the bar graphs were analyzed by one-way ANOVA (A-A', B-B') to test the statistical significance: \*,  $p < 0.05$ . \*\*,  $p < 0.01$ . \*\*\*,  $p < 0.001$ .

(A, A') Expression of *Ampd3* in the female (A) or male (A') embryos.

(B, B') Expression of *Xlr3b* in the female (B) or male (B') embryos.

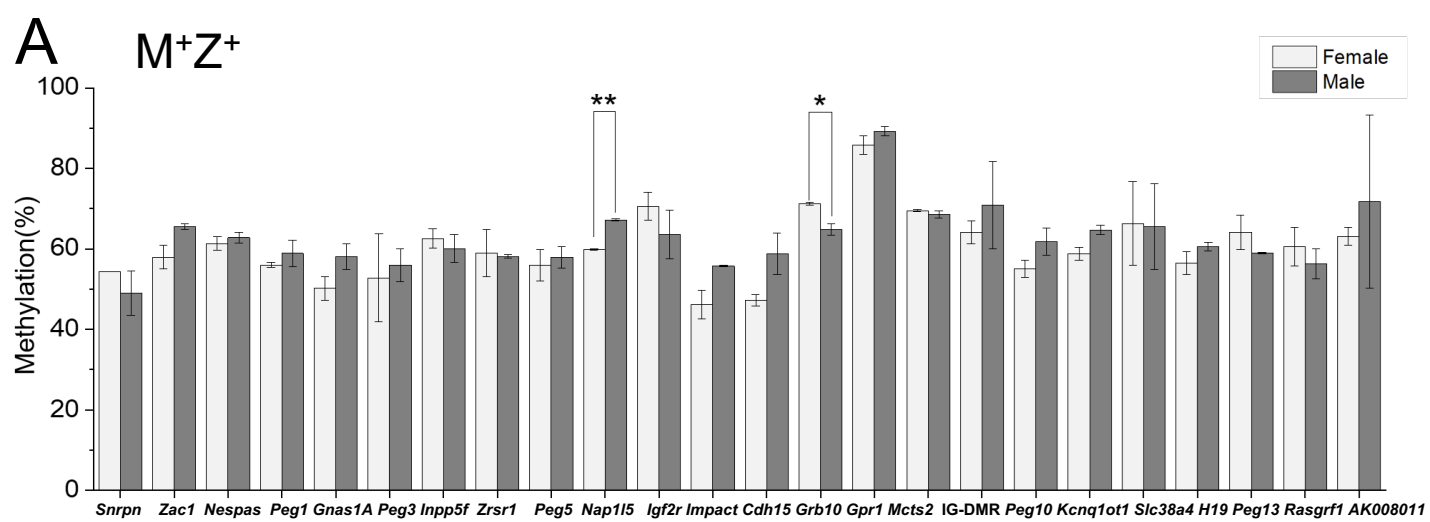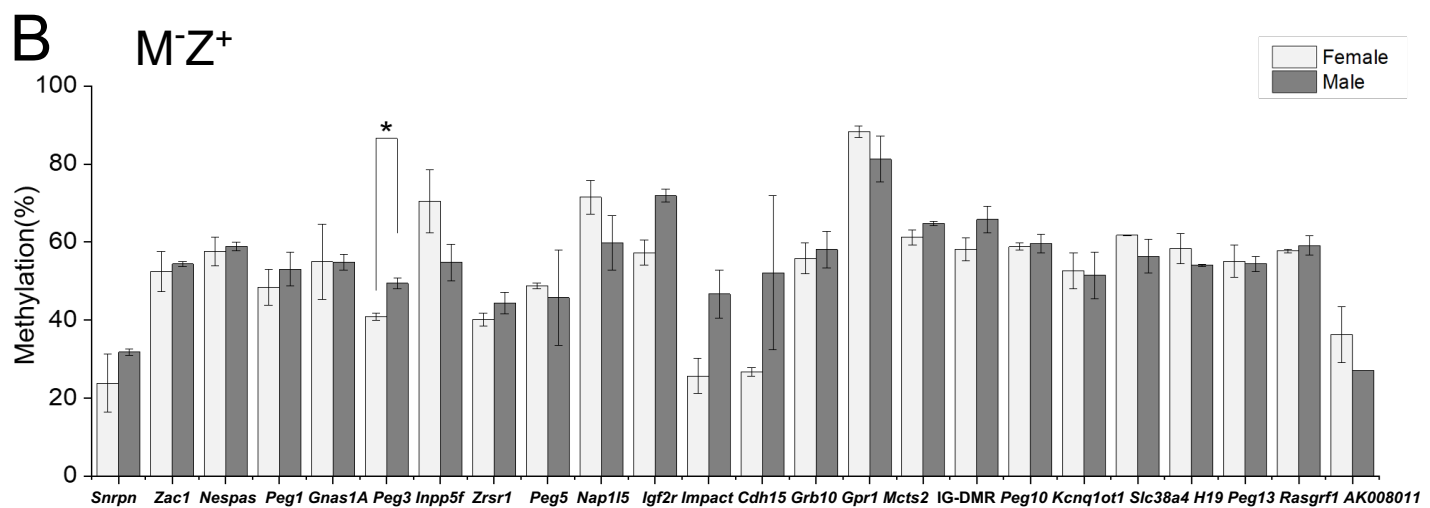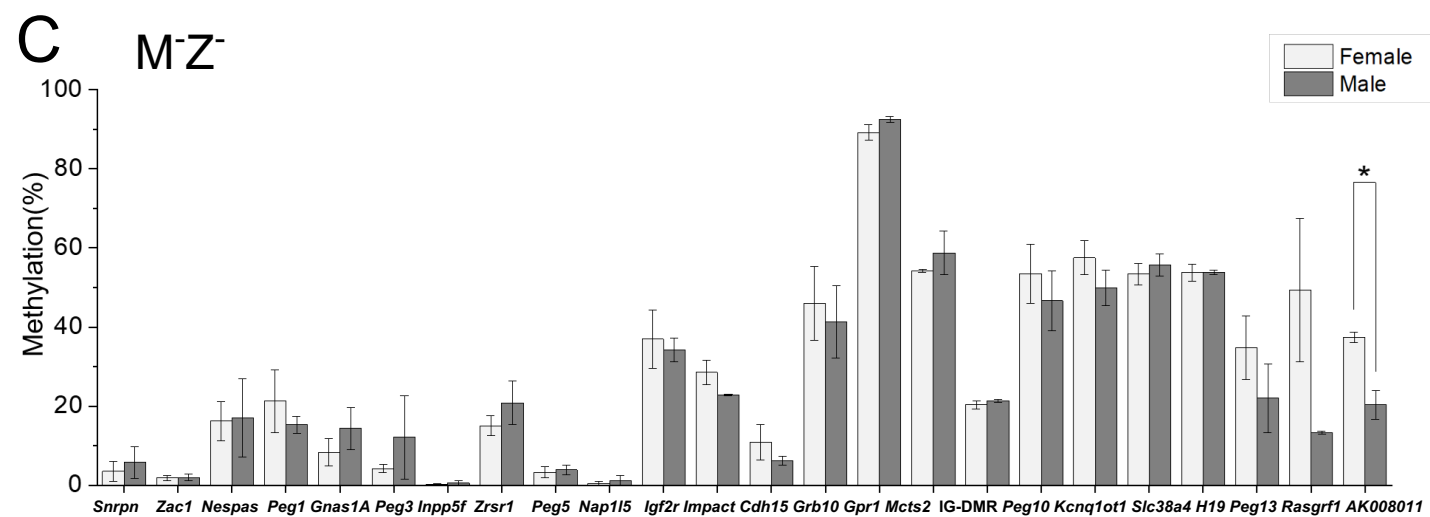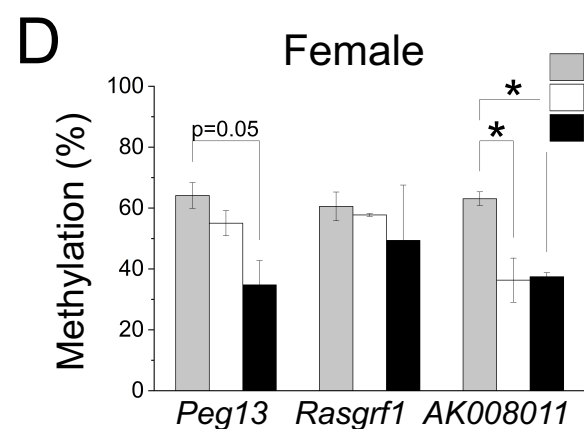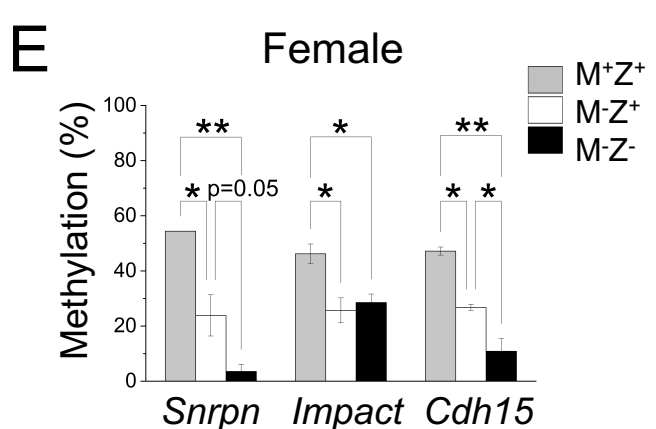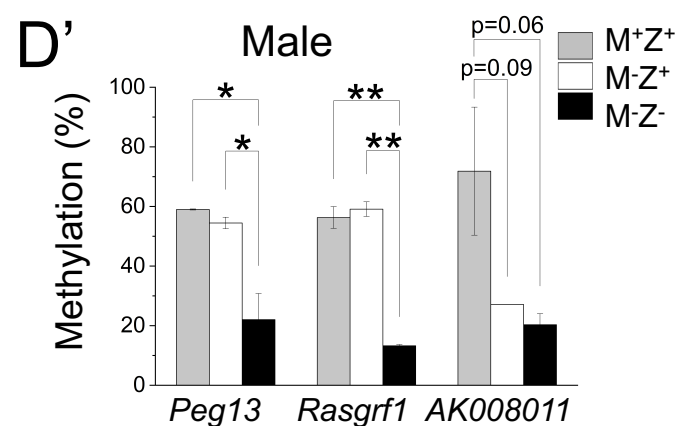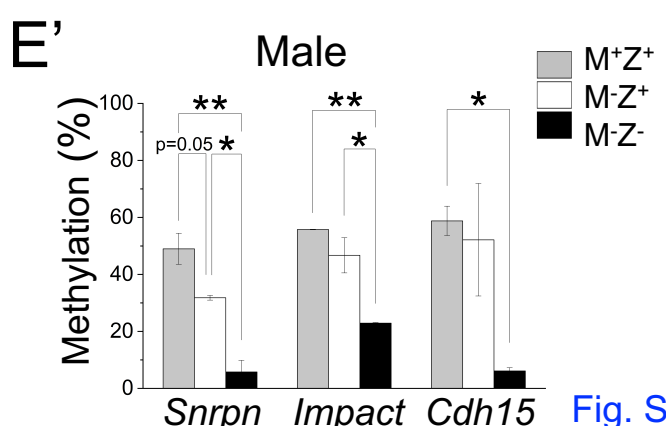

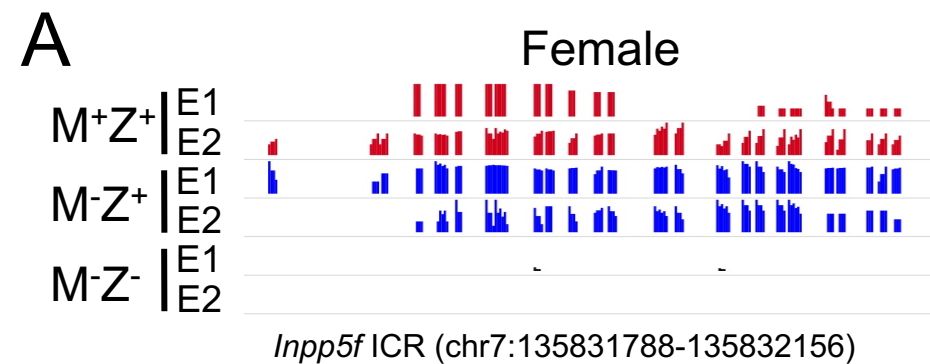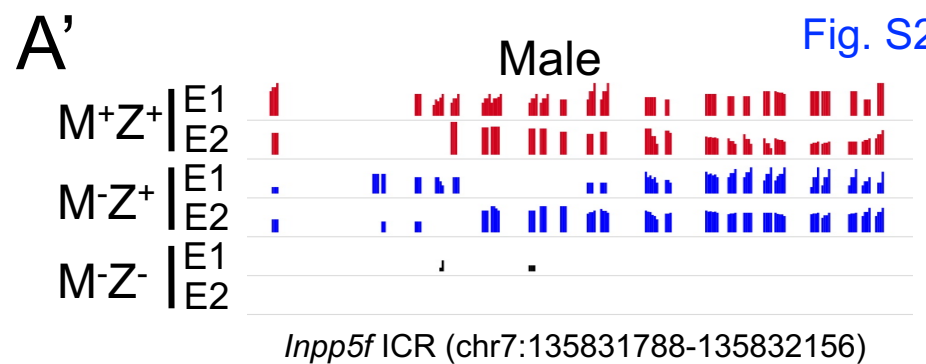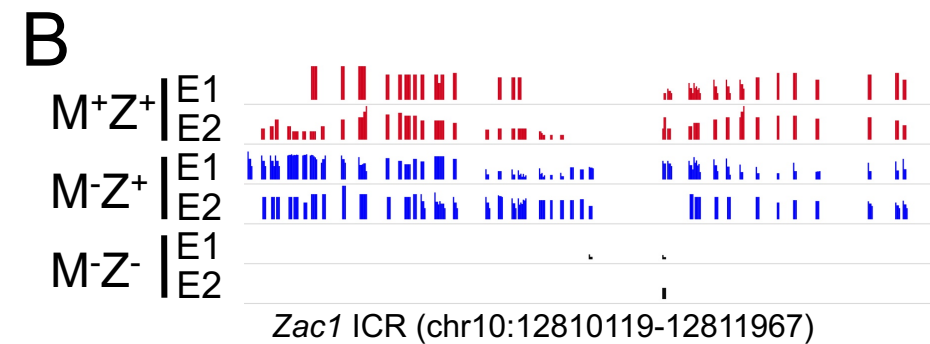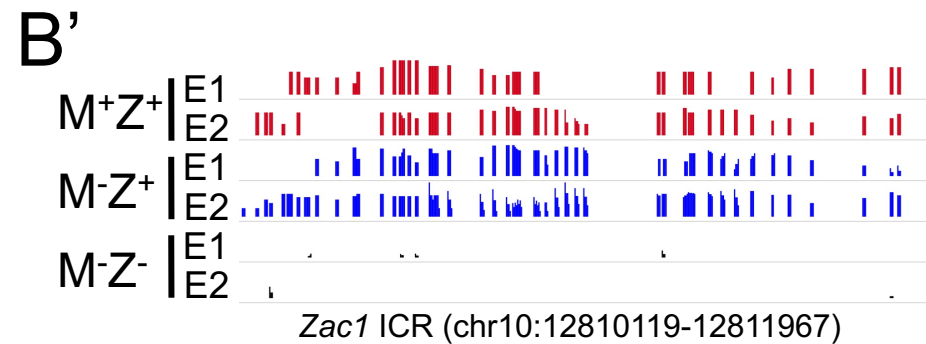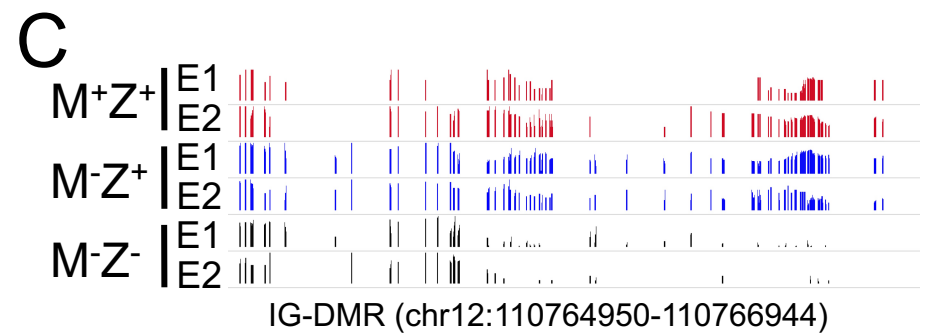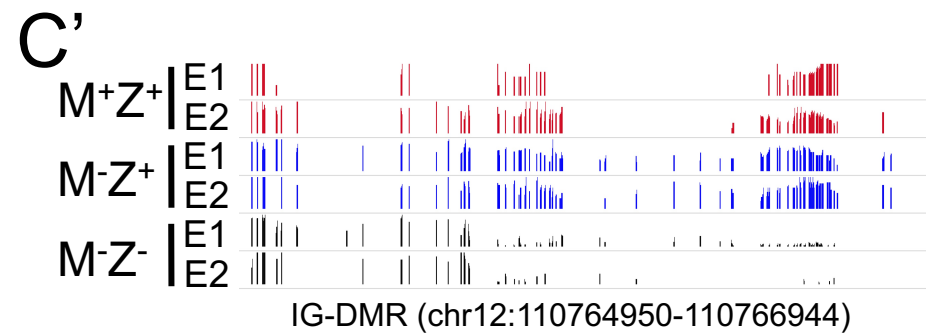





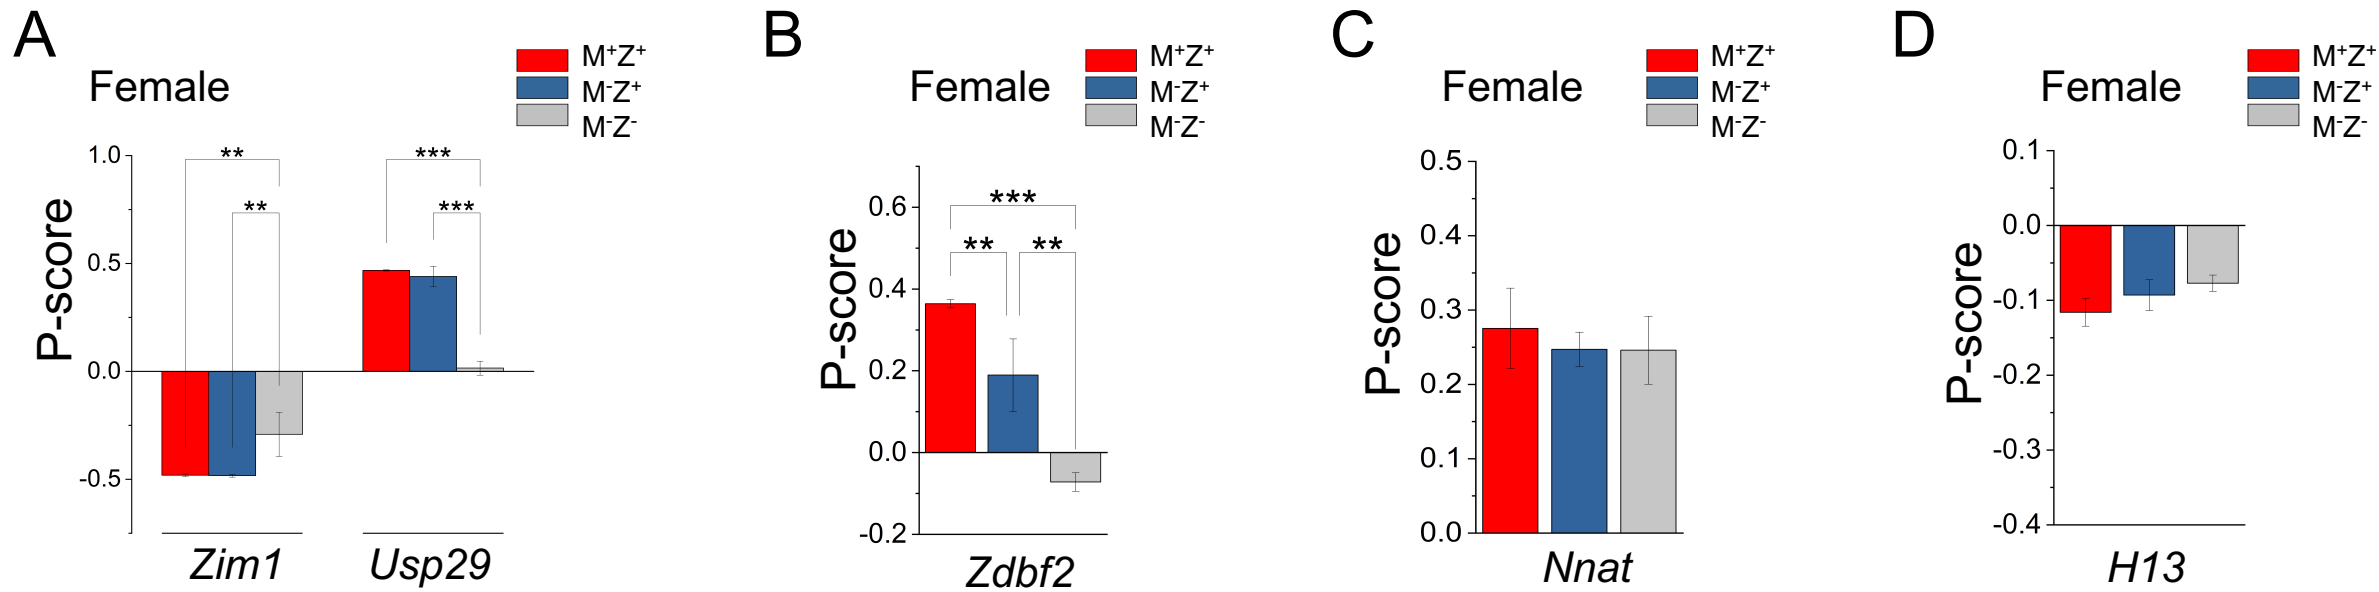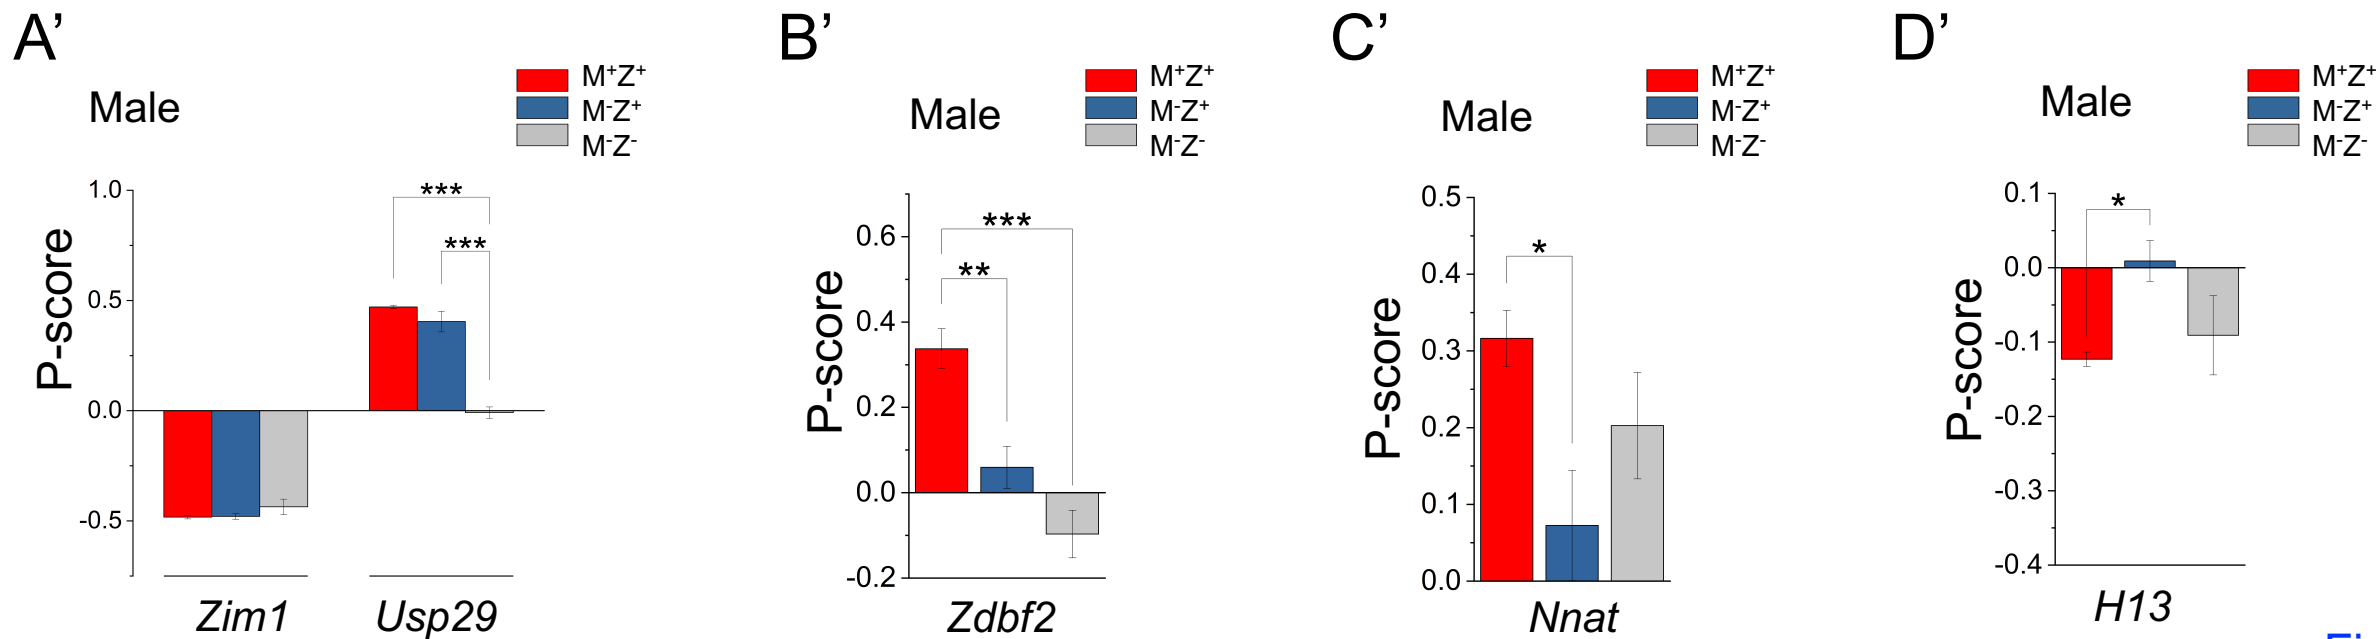

Fig. S4

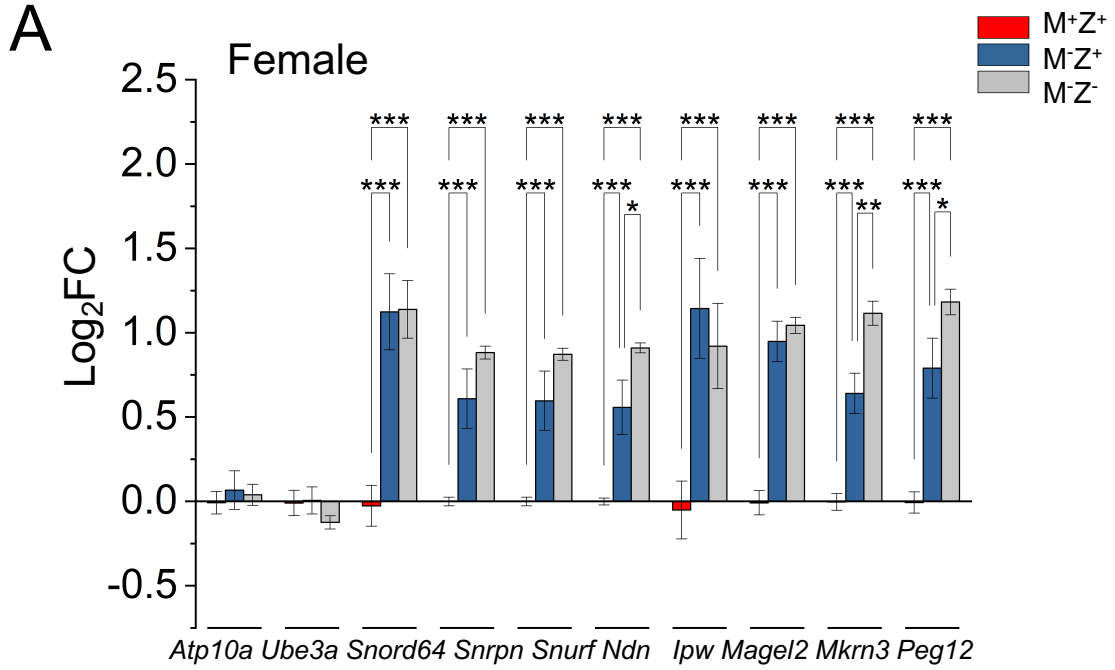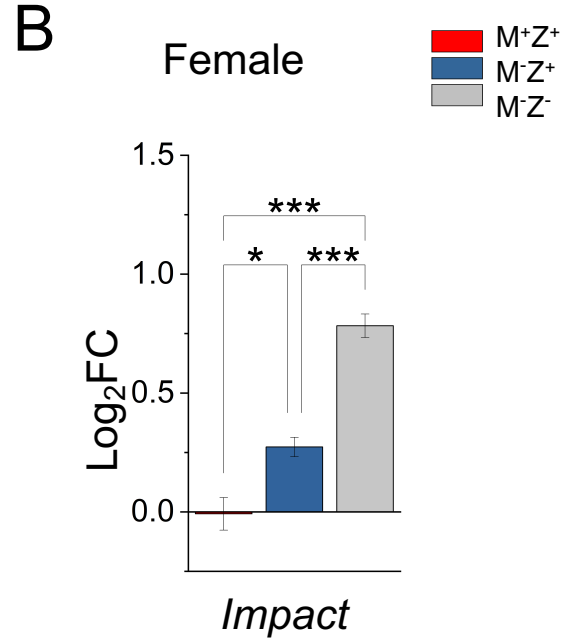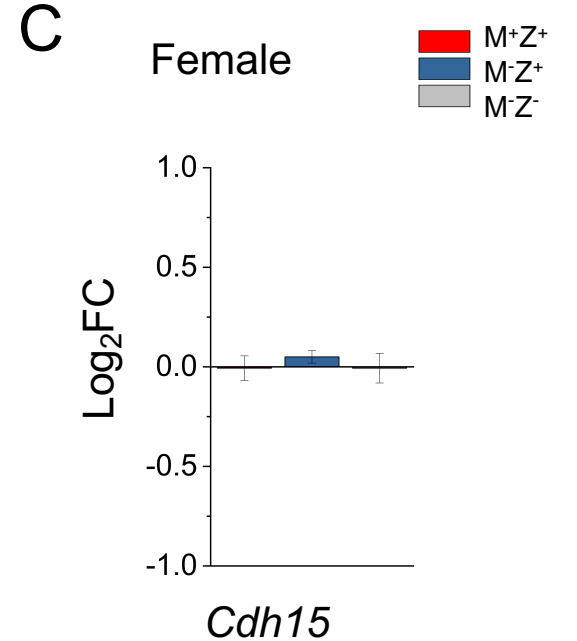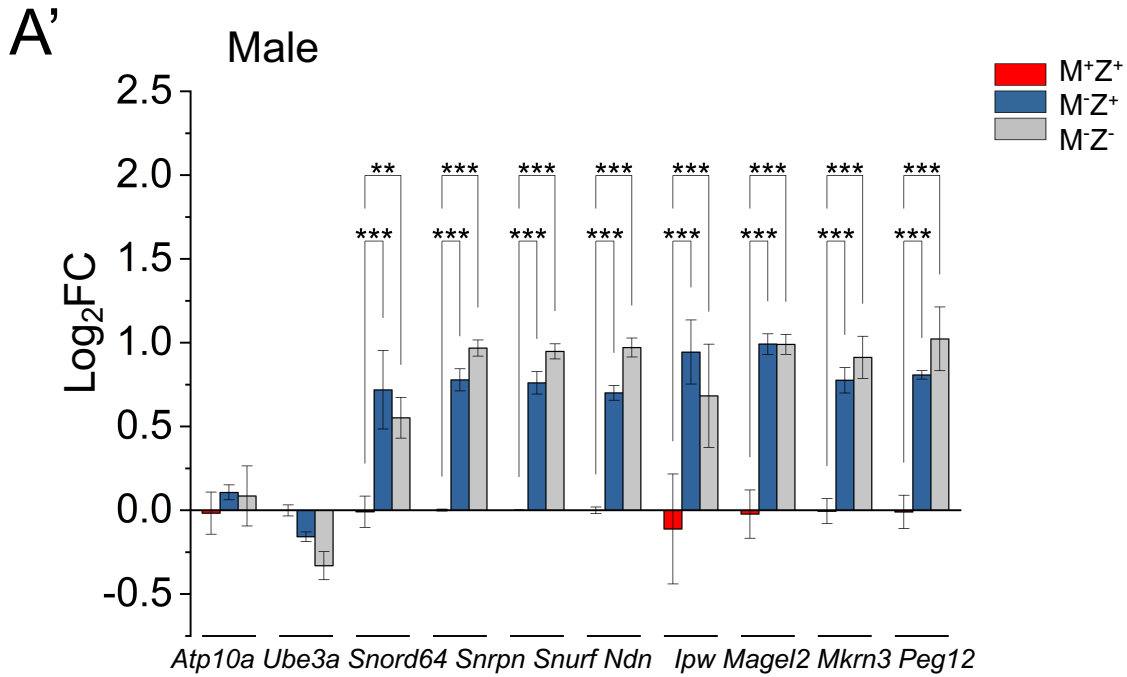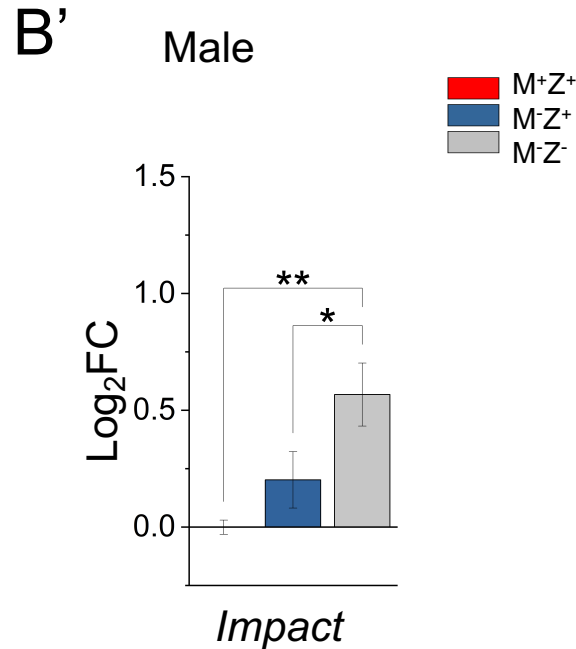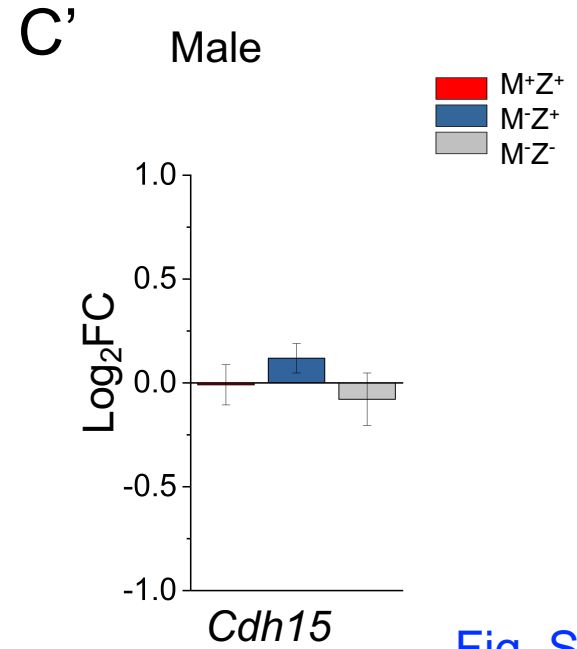

Fig. S5

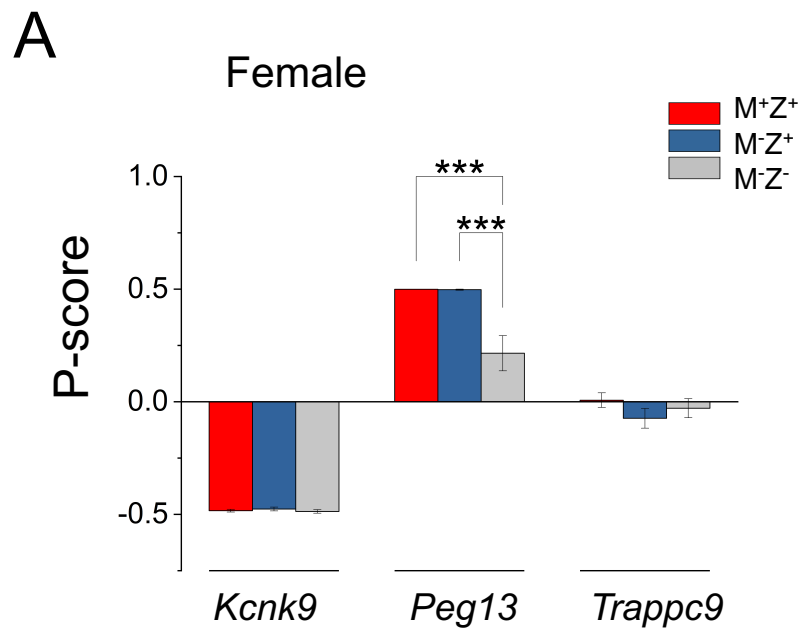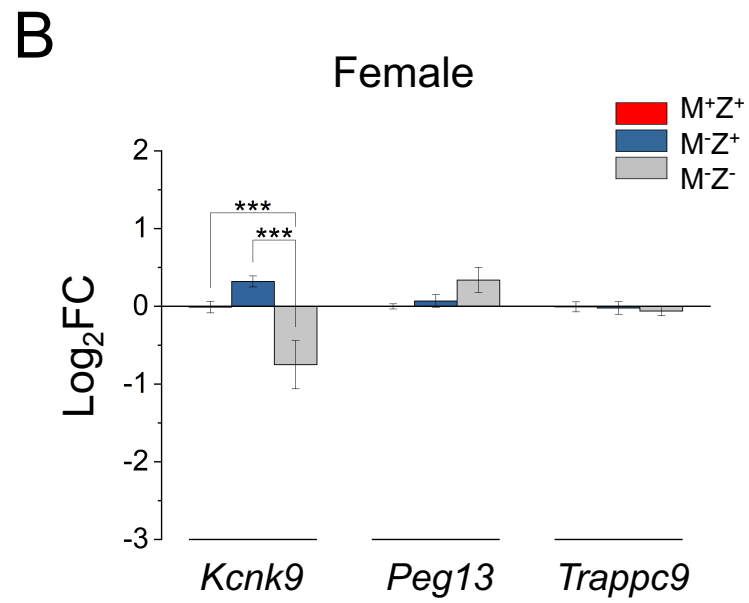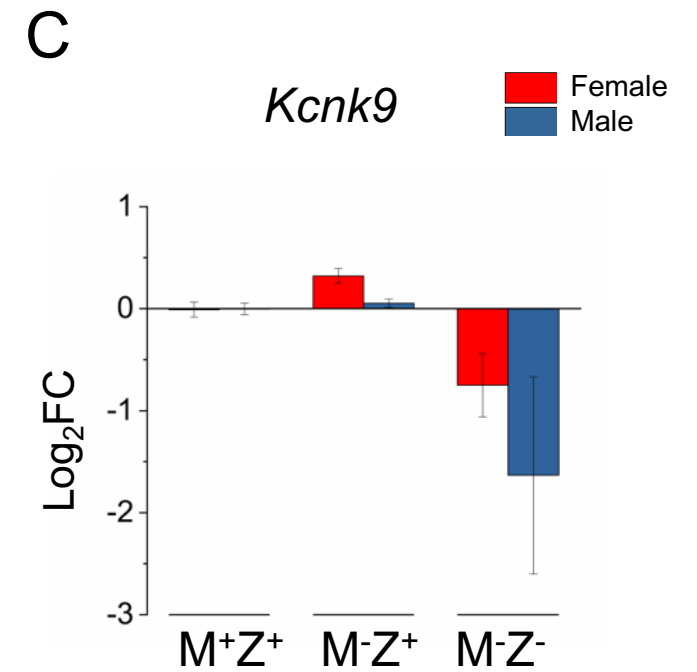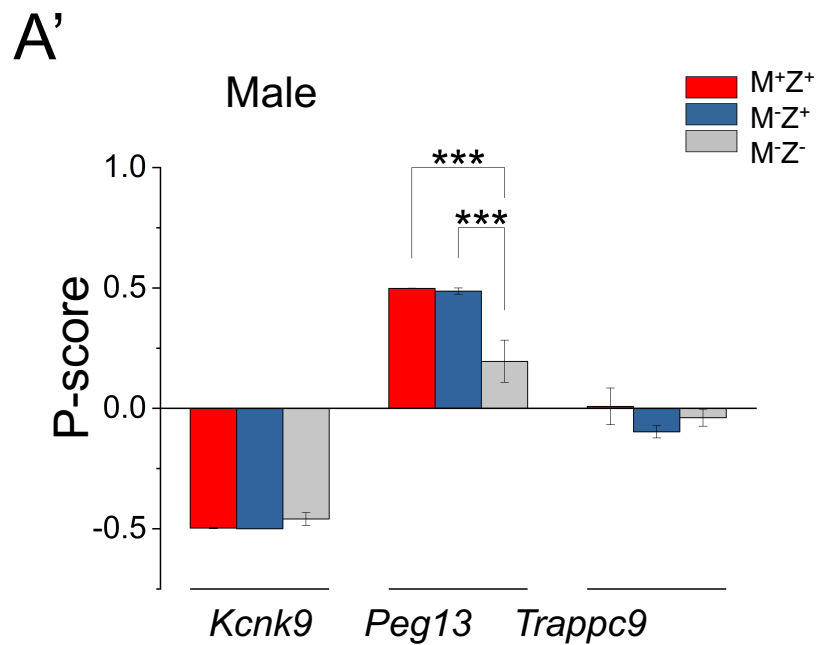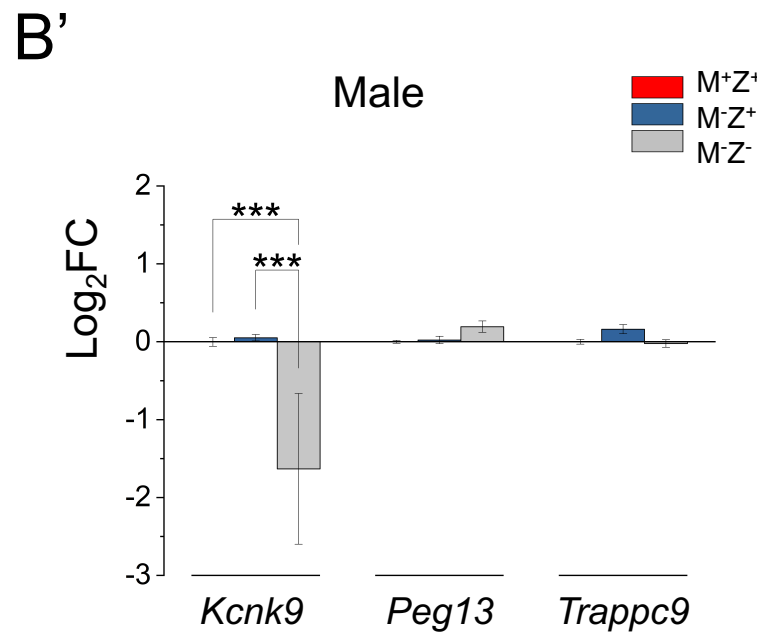

Fig. S6

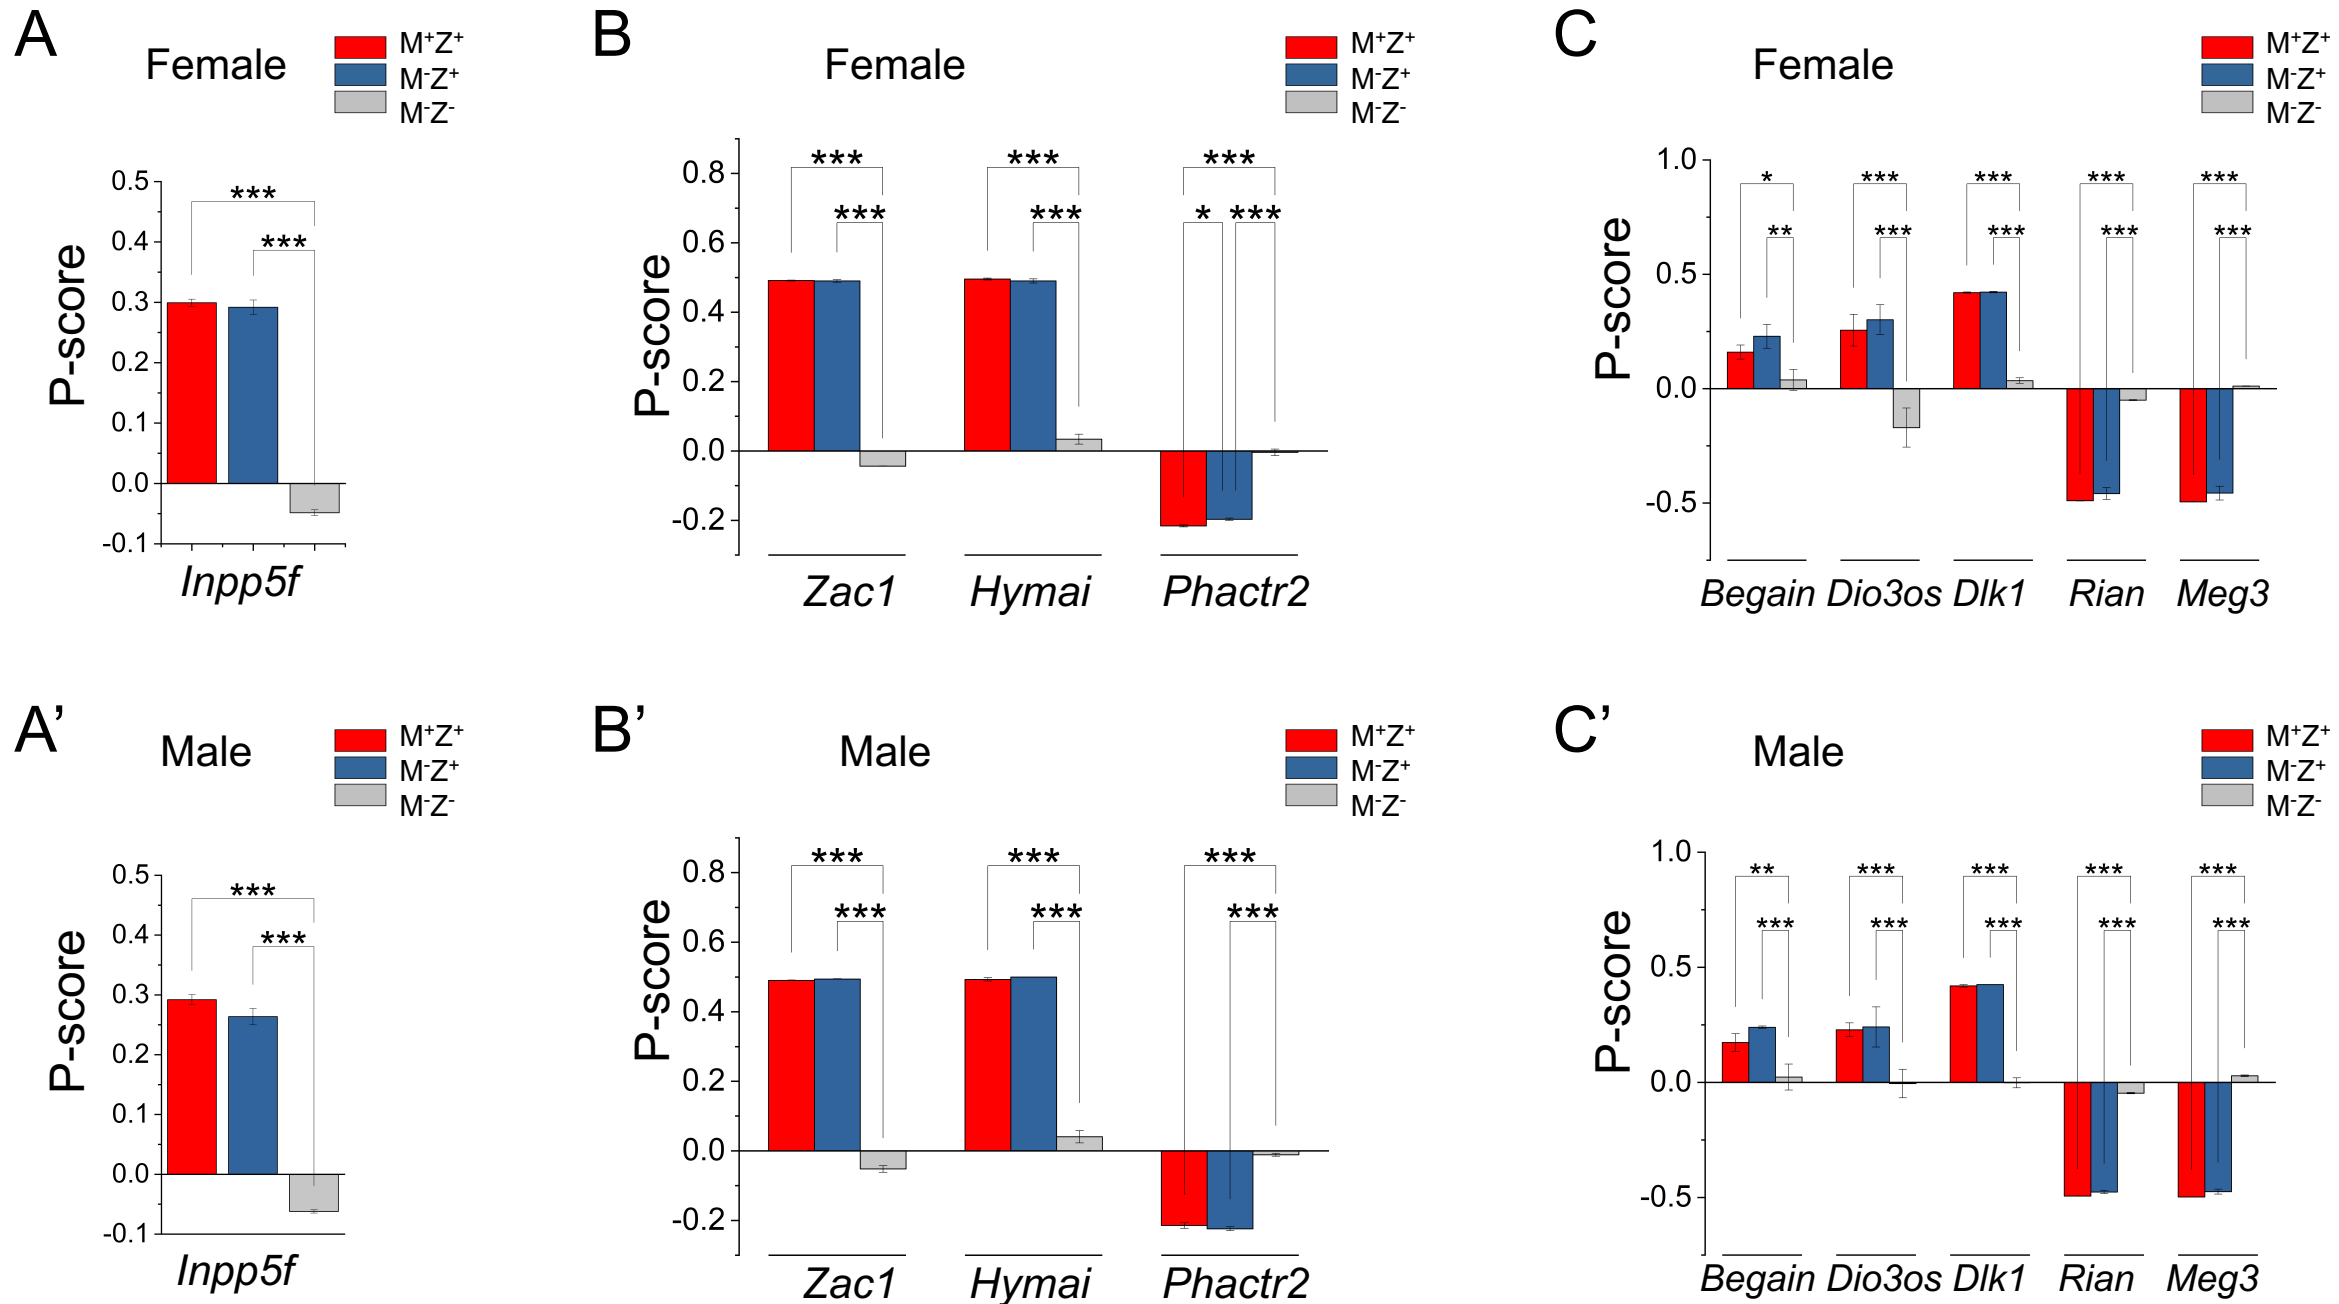

Fig. S7

A

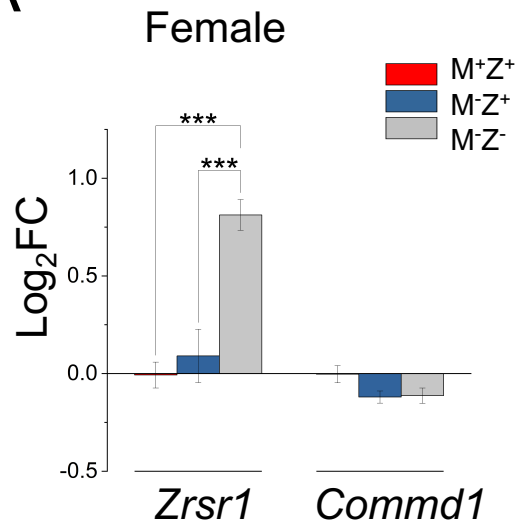

B

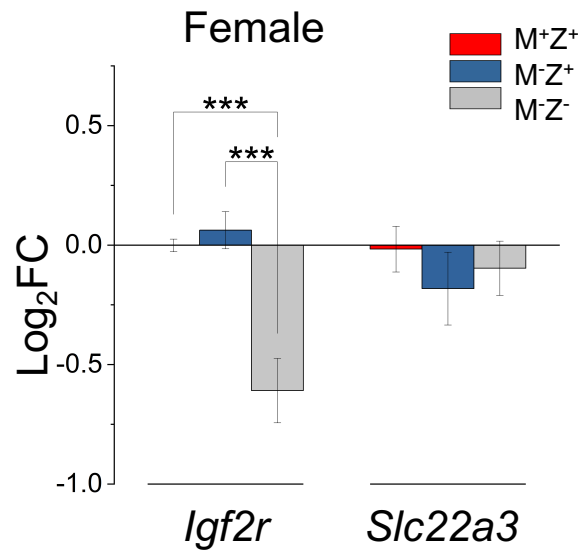

C

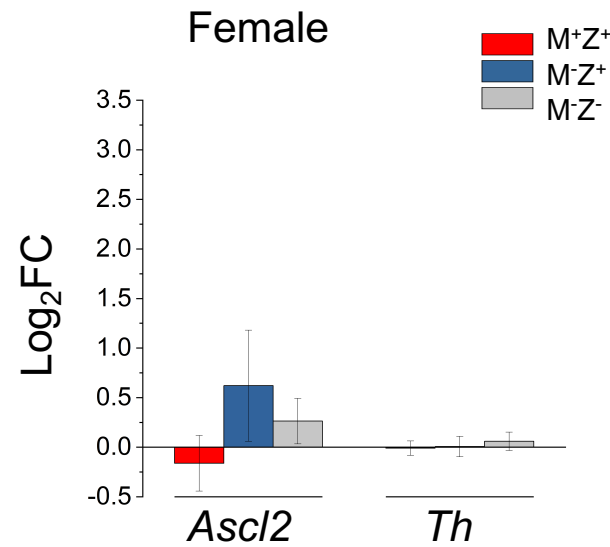

D

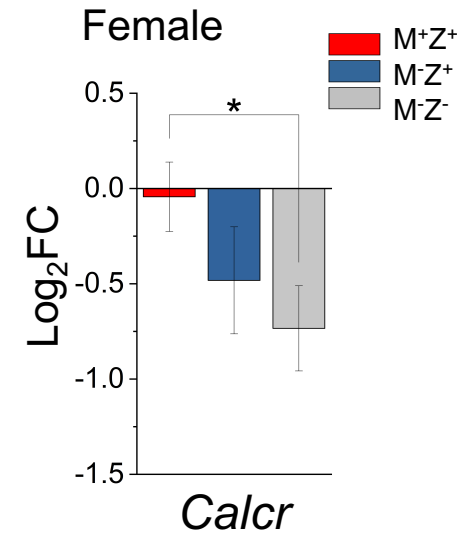

A'

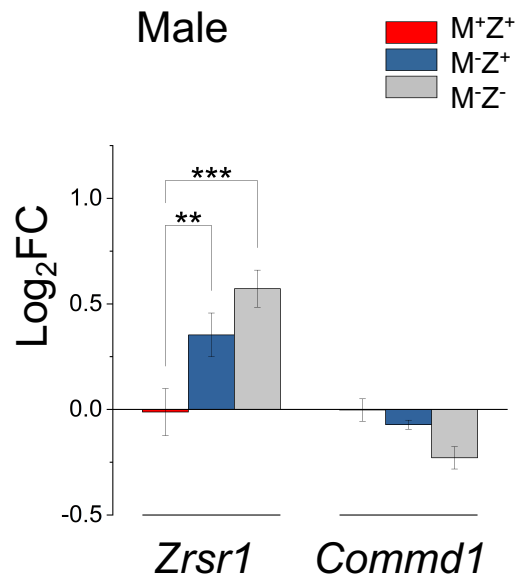

B'

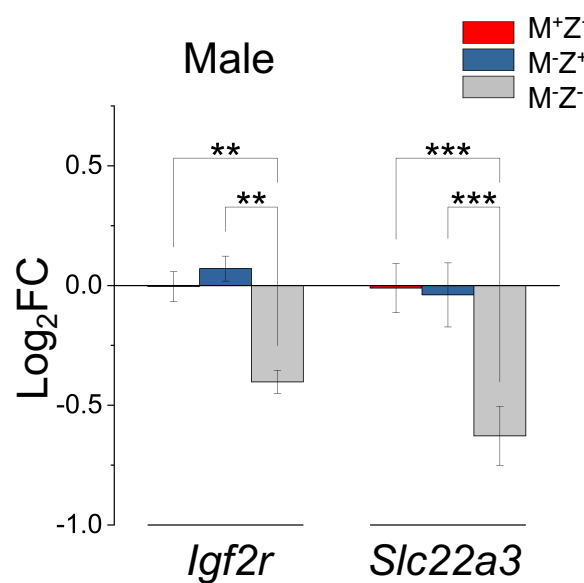

C'

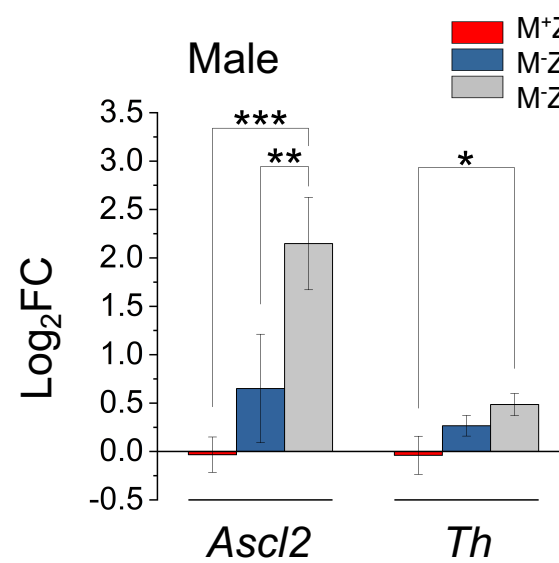

D'

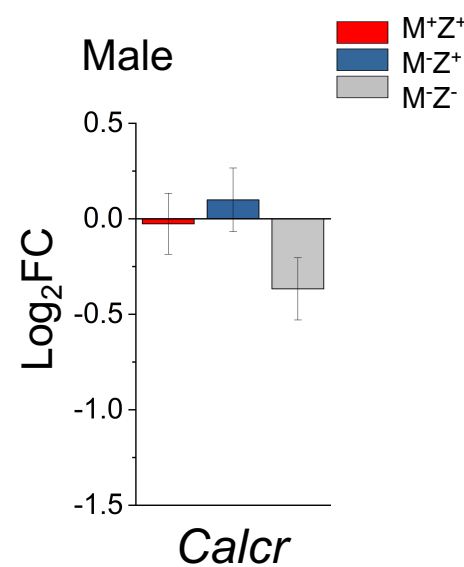

A

Female

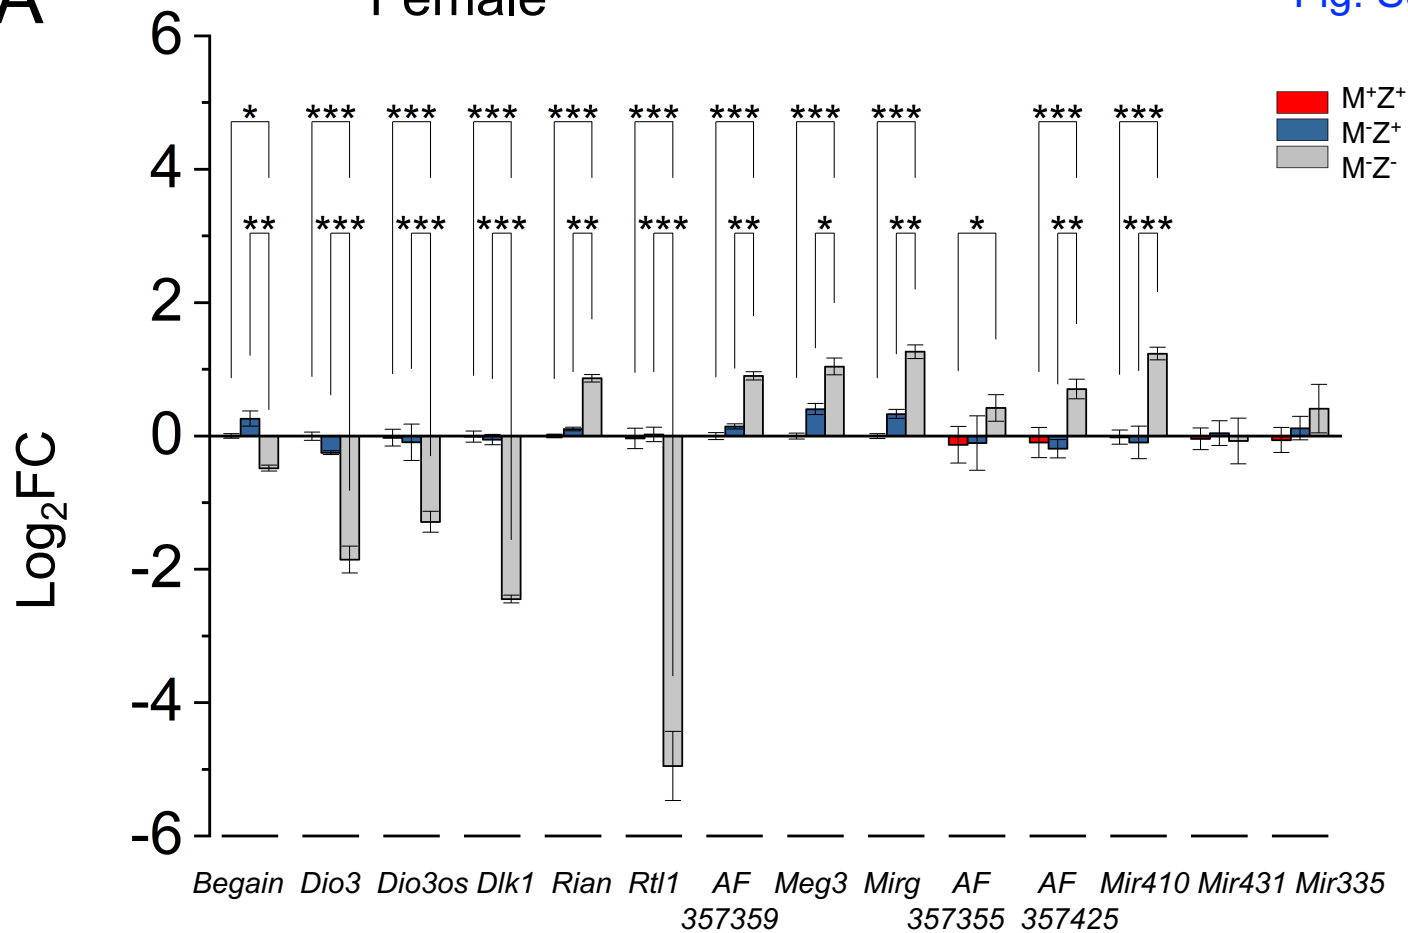

A'

Male

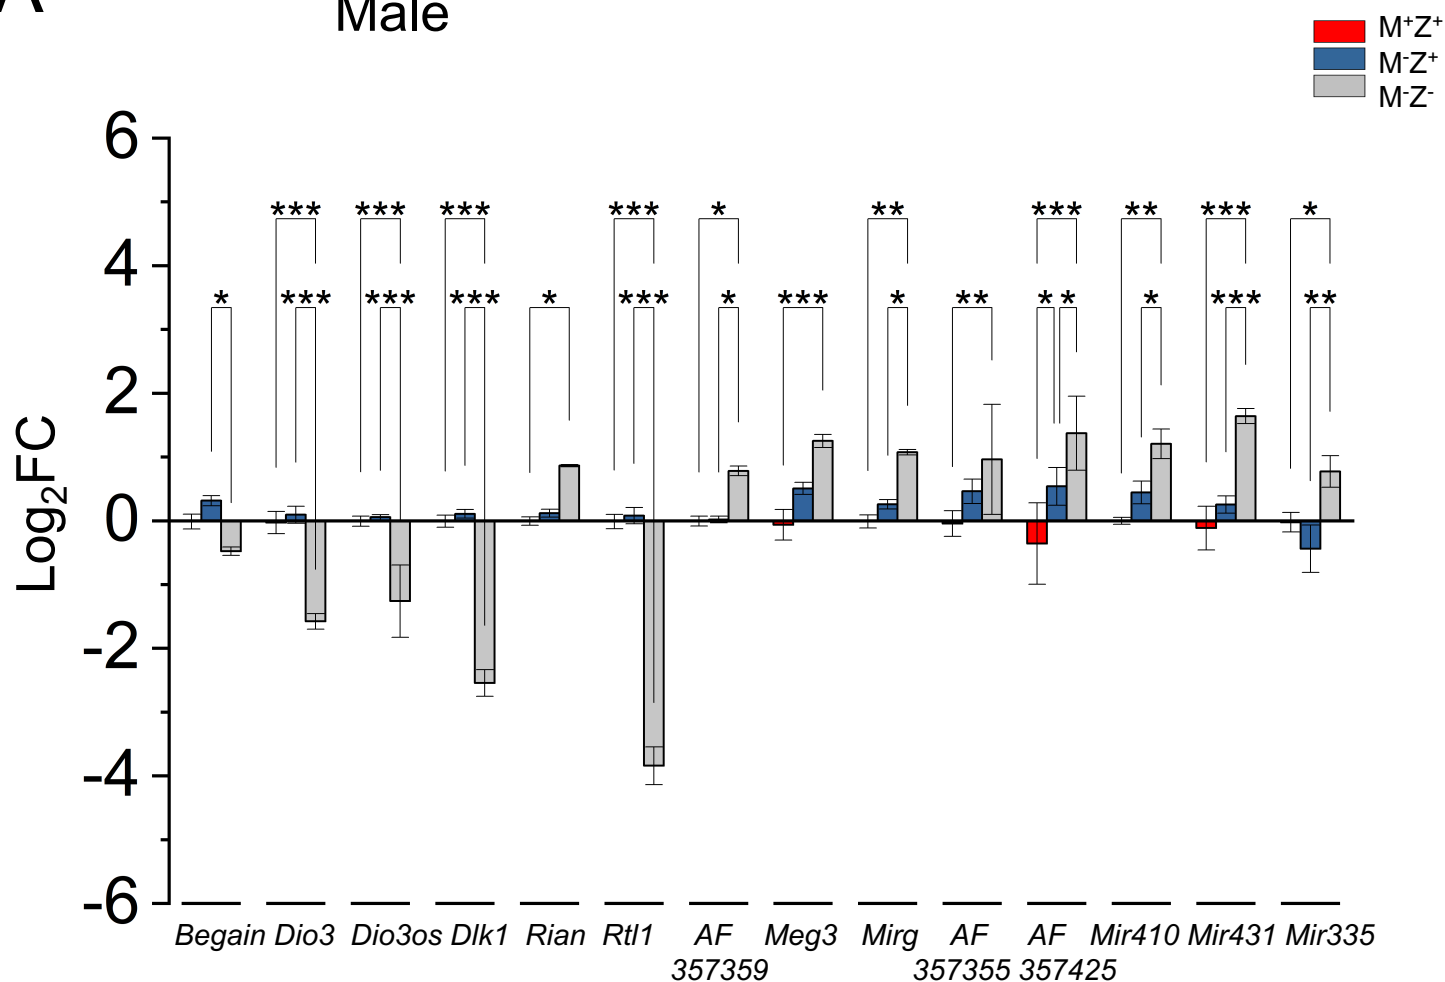

**A**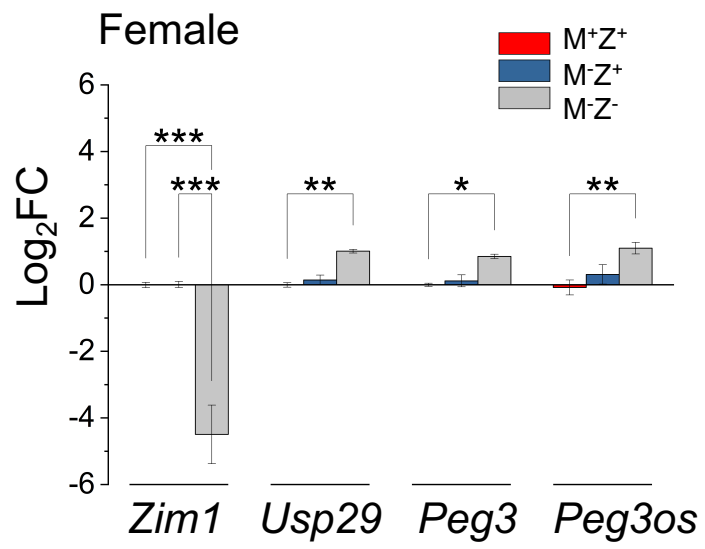**B**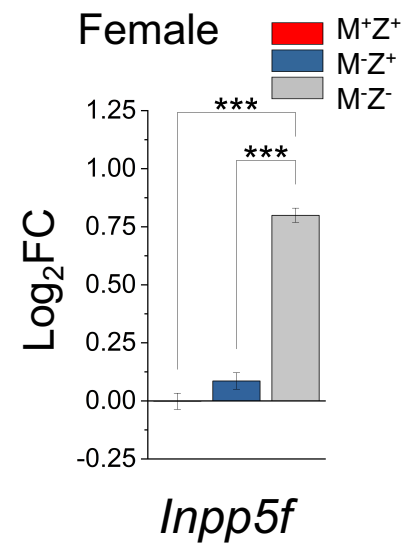**C**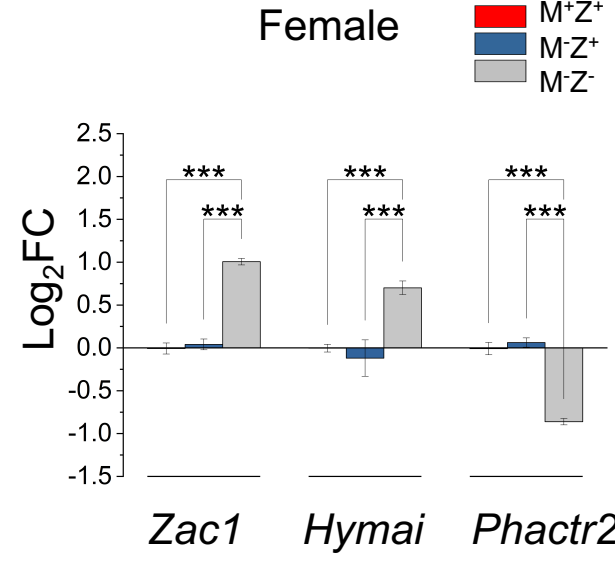**D**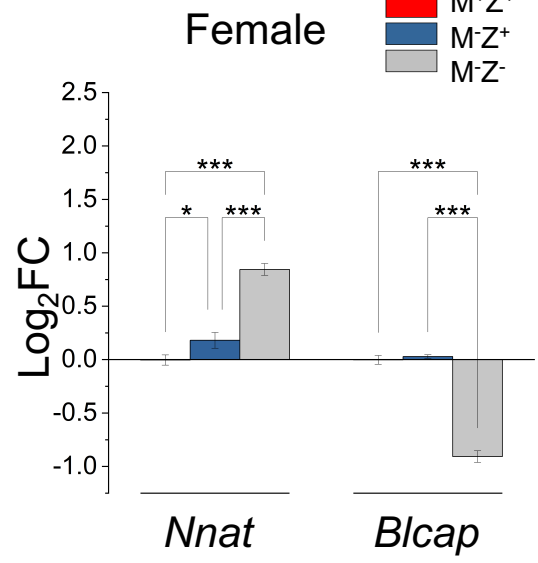**A'**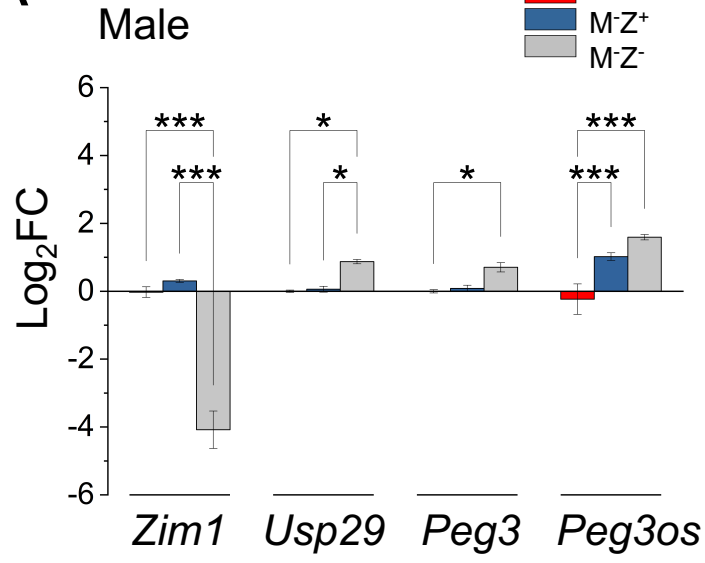**B'**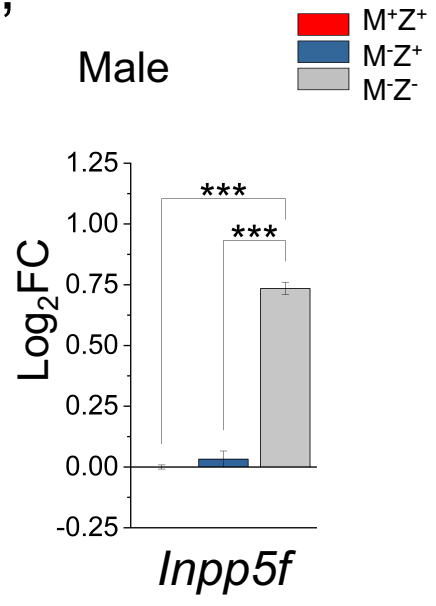**C'**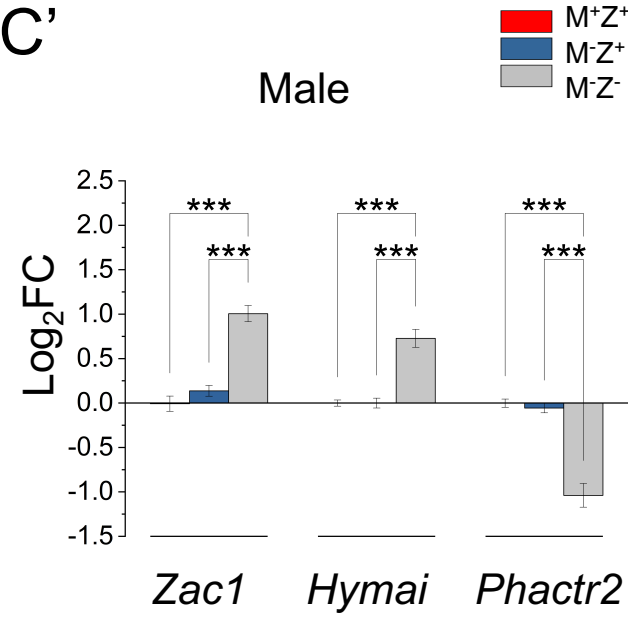**D'**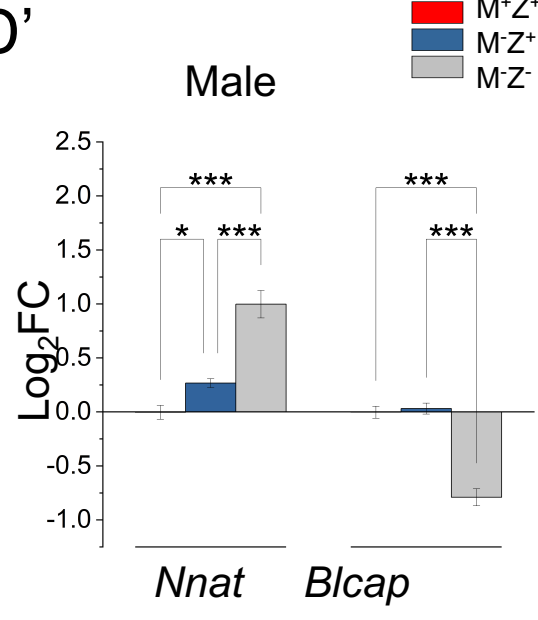

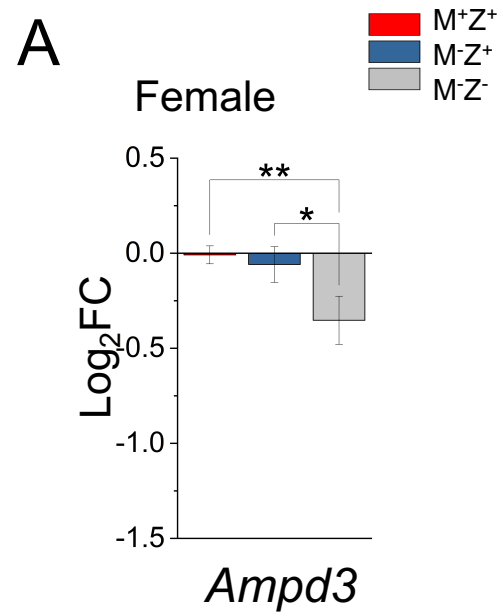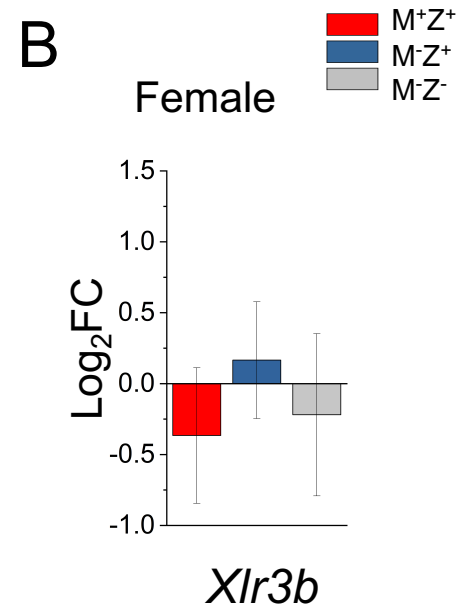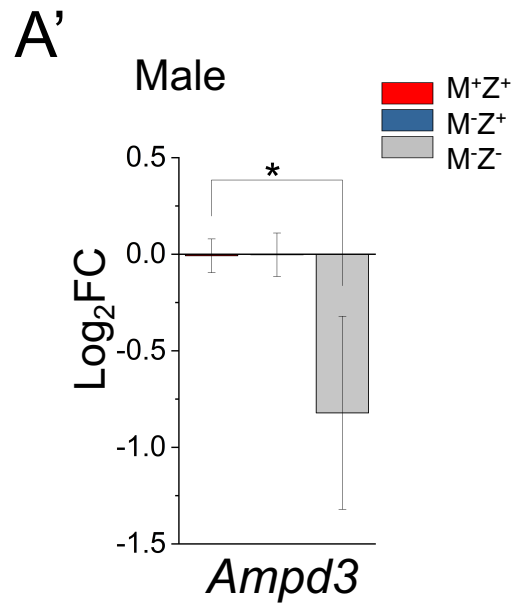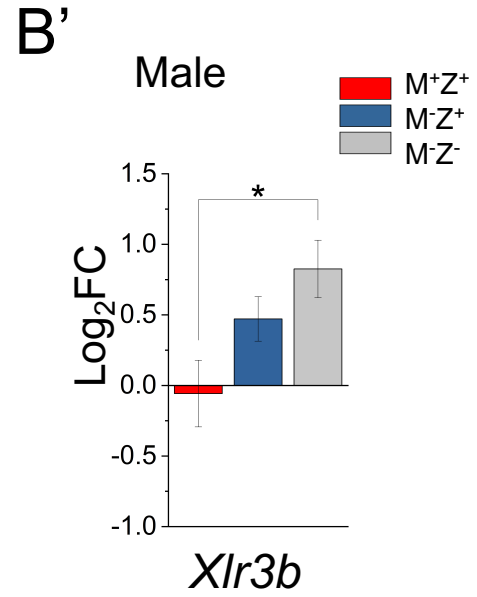



**Table S1. Allelic ICR methylation percentage is shown for *Snrpn* and *Impact* imprinted regions in the female embryos.**

**% of ICR methylation on the paternal (P) or maternal (M) chromosome in the female embryos**

|               | <b>M<sup>+</sup>Z<sup>+</sup></b> |         |       |        | <b>M<sup>-</sup>Z<sup>+</sup></b> |        |       |        | <b>M<sup>-</sup>Z<sup>-</sup></b> |        |       |        |
|---------------|-----------------------------------|---------|-------|--------|-----------------------------------|--------|-------|--------|-----------------------------------|--------|-------|--------|
|               | Emb1                              |         | Emb2  |        | Emb1                              |        | Emb2  |        | Emb1                              |        | Emb2  |        |
|               | P                                 | M       | P     | M      | P                                 | M      | P     | M      | P                                 | M      | P     | M      |
| <i>Snrpn</i>  | 5.32%                             | 91.55%  | 2.54% | 94.17% | 4.55%                             | 17.44% | 9.09% | 58.54% | 16.49%                            | 2.96%  | 0.00% | 0.00%  |
| <i>Impact</i> | 0.00%                             | 100.00% | 0.00% | 92.11% | 0.00%                             | 39.03% | NA    | 31.94% | 0.00%                             | 36.67% | 0.00% | 53.95% |

**Note:** NA, not applicable. NA means here that methylation can not be calculated because there are no reads with the SNP for the ICR of this sample.

**Reads of the ICRs on the paternal (P) or maternal (M) chromosome in the female embryos**

|               | <b>M<sup>+</sup>Z<sup>+</sup></b> |    |      |    | <b>M<sup>-</sup>Z<sup>+</sup></b> |    |      |    | <b>M<sup>-</sup>Z<sup>-</sup></b> |    |      |    |
|---------------|-----------------------------------|----|------|----|-----------------------------------|----|------|----|-----------------------------------|----|------|----|
|               | Emb1                              |    | Emb2 |    | Emb1                              |    | Emb2 |    | Emb1                              |    | Emb2 |    |
|               | P                                 | M  | P    | M  | P                                 | M  | P    | M  | P                                 | M  | P    | M  |
| <i>Snrpn</i>  | 58                                | 69 | 59   | 30 | 55                                | 72 | 22   | 41 | 46                                | 63 | 41   | 48 |
| <i>Impact</i> | 17                                | 15 | 14   | 19 | 18                                | 12 | NA   | 12 | 16                                | 5  | 4    | 19 |

**Note:** NA, not applicable. NA means here that there are no reads with the SNP for the ICR of the either allele in a particular sample.

**Table S2. Allelic ICR methylation percentage is shown for *Snrpn* and *Impact* imprinted regions in the male embryos.**

**% of ICR methylation on the paternal (P) or maternal (M) chromosome in the male embryos**

|               | <b>M<sup>+</sup>Z<sup>+</sup></b> |         |       |        | <b>M<sup>-</sup>Z<sup>+</sup></b> |        |       |        | <b>M<sup>-</sup>Z<sup>-</sup></b> |        |        |        |
|---------------|-----------------------------------|---------|-------|--------|-----------------------------------|--------|-------|--------|-----------------------------------|--------|--------|--------|
|               | Emb1                              |         | Emb2  |        | Emb1                              |        | Emb2  |        | Emb1                              |        | Emb2   |        |
|               | P                                 | M       | P     | M      | P                                 | M      | P     | M      | P                                 | M      | P      | M      |
| <i>Snrpn</i>  | 12.88%                            | 95.58%  | 3.45% | 93.37% | 0.00%                             | 41.67% | 5.98% | 92.22% | 0.53%                             | 0.86%  | 20.73% | 2.13%  |
| <i>Impact</i> | 0.00%                             | 100.00% | 0.00% | 95.10% | 0.00%                             | 83.33% | 0.00% | 86.27% | 3.33%                             | 13.33% | 0.00%  | 72.42% |

**Reads of the ICRs on the paternal (P) or maternal (M) chromosome in the male embryos**

|               | <b>M<sup>+</sup>Z<sup>+</sup></b> |    |      |    | <b>M<sup>-</sup>Z<sup>+</sup></b> |    |      |    | <b>M<sup>-</sup>Z<sup>-</sup></b> |    |      |    |
|---------------|-----------------------------------|----|------|----|-----------------------------------|----|------|----|-----------------------------------|----|------|----|
|               | Emb1                              |    | Emb2 |    | Emb1                              |    | Emb2 |    | Emb1                              |    | Emb2 |    |
|               | P                                 | M  | P    | M  | P                                 | M  | P    | M  | P                                 | M  | P    | M  |
| <i>Snrpn</i>  | 62                                | 63 | 29   | 52 | 42                                | 36 | 46   | 30 | 47                                | 58 | 41   | 47 |
| <i>Impact</i> | 14                                | 10 | 6    | 17 | 11                                | 13 | 12   | 17 | 15                                | 10 | 7    | 11 |

Table S3. Allelic expression of some imprinted genes is shown with the calculated P-score of the imprinted gene based on the sequence reads of the paternal (P) and maternal (M) alleles in the female embryos.

|     |                | Reads of the imprinted genes on the paternal (P) or maternal (M) chromosome in the female embryos |      |       |      |       |      |       |      |       |      |       |      |                               |      |       |      |       |      |       |      |       |      |       |      | P-scores of the imprinted genes in the female embryos |      |       |       |       |       |                               |       |       |       |       |       |       |       |       |       |       |       |       |       |
|-----|----------------|---------------------------------------------------------------------------------------------------|------|-------|------|-------|------|-------|------|-------|------|-------|------|-------------------------------|------|-------|------|-------|------|-------|------|-------|------|-------|------|-------------------------------------------------------|------|-------|-------|-------|-------|-------------------------------|-------|-------|-------|-------|-------|-------|-------|-------|-------|-------|-------|-------|-------|
|     |                | M <sup>+</sup> Z <sup>+</sup>                                                                     |      |       |      |       |      |       |      |       |      |       |      | M <sup>-</sup> Z <sup>-</sup> |      |       |      |       |      |       |      |       |      |       |      | M <sup>+</sup> Z <sup>+</sup>                         |      |       |       |       |       | M <sup>-</sup> Z <sup>-</sup> |       |       |       |       |       |       |       |       |       |       |       |       |       |
| ICR | Gene           | Emb 1                                                                                             |      | Emb 2 |      | Emb 3 |      | Emb 4 |      | Emb 5 |      | Emb 6 |      | Emb 1                         |      | Emb 2 |      | Emb 3 |      | Emb 1 |      | Emb 2 |      | Emb 3 |      | Emb 4                                                 |      | Emb 1 | Emb 2 | Emb 3 | Emb 4 | Emb 5                         | Emb 6 | Emb 1 | Emb 2 | Emb 3 | Emb 4 | Emb 5 | Emb 6 | Emb 1 | Emb 2 | Emb 3 | Emb 4 | Emb 5 | Emb 6 |
|     |                | P                                                                                                 | M    | P     | M    | P     | M    | P     | M    | P     | M    | P     | M    | P                             | M    | P     | M    | P     | M    | P     | M    | P     | M    | P     | M    | P                                                     | M    |       |       |       |       |                               |       |       |       |       |       |       |       |       |       |       |       |       |       |
|     | <i>Kcnk9</i>   | 1                                                                                                 | 65   | 2     | 63   | 1     | 60   | 3     | 79   | 0     | 92   | 0     | 85   | 1                             | 91   | 2     | 92   | 3     | 74   | 2     | 89   | 0     | 24   | 1     | 32   | 0                                                     | 35   | -0.48 | -0.47 | -0.48 | -0.46 | -0.5                          | -0.5  | -0.49 | -0.48 | -0.46 | -0.48 | -0.5  | -0.47 | -0.5  |       |       |       |       |       |
|     | <i>Peg13</i>   | 404                                                                                               | 0    | 367   | 0    | 363   | 0    | 359   | 0    | 397   | 0    | 341   | 1    | 366                           | 0    | 361   | 0    | 409   | 3    | 363   | 21   | 338   | 219  | 351   | 208  | 328                                                   | 153  | 0.5   | 0.5   | 0.5   | 0.5   | 0.5                           | 0.5   | 0.5   | 0.5   | 0.5   | 0.49  | 0.45  | 0.11  | 0.13  | 0.18  |       |       |       |       |
|     | <i>Trappc9</i> | 28                                                                                                | 20   | 26    | 27   | 26    | 16   | 21    | 31   | 26    | 29   | 25    | 28   | 26                            | 31   | 16    | 31   | 28    | 30   | 41    | 37   | 16    | 28   | 16    | 20   | 27                                                    | 22   | 0.08  | -0.01 | 0.12  | -0.1  | -0.03                         | -0.03 | -0.04 | -0.16 | -0.02 | 0.03  | -0.14 | -0.06 | 0.05  |       |       |       |       |       |
|     | <i>Atp10a</i>  | 36                                                                                                | 35   | 32    | 28   | 37    | 23   | 23    | 38   | 39    | 50   | 39    | 40   | 35                            | 40   | 25    | 35   | 31    | 43   | 39    | 55   | 29    | 40   | 37    | 39   | 37                                                    | 30   | 0.01  | 0.03  | 0.12  | -0.12 | -0.06                         | -0.01 | -0.03 | -0.08 | -0.08 | -0.09 | -0.08 | -0.01 | 0.05  |       |       |       |       |       |
|     | <i>Ube3a</i>   | 594                                                                                               | 662  | 519   | 710  | 495   | 611  | 565   | 706  | 733   | 832  | 656   | 790  | 640                           | 613  | 518   | 620  | 643   | 731  | 707   | 657  | 683   | 642  | 542   | 526  | 626                                                   | 637  | -0.03 | -0.08 | -0.05 | -0.06 | -0.03                         | -0.05 | 0.01  | -0.04 | -0.03 | 0.02  | 0.02  | 0.01  | -0    |       |       |       |       |       |
|     | <i>Snord64</i> | 7                                                                                                 | 0    | 6     | 0    | 9     | 0    | 10    | 0    | 25    | 0    | 8     | 0    | 10                            | 27   | 15    | 11   | 13    | 2    | 10    | 20   | 11    | 23   | 7     | 11   | 16                                                    | 7    | 0.5   | 0.5   | 0.5   | 0.5   | 0.5                           | 0.5   | -0.23 | 0.08  | 0.37  | -0.17 | -0.18 | -0.11 | 0.2   |       |       |       |       |       |
|     | <i>Snrpn</i>   | 684                                                                                               | 1    | 693   | 2    | 674   | 8    | 712   | 5    | 724   | 15   | 676   | 2    | 609                           | 706  | 636   | 265  | 718   | 254  | 701   | 829  | 656   | 744  | 673   | 681  | 632                                                   | 751  | 0.5   | 0.5   | 0.49  | 0.49  | 0.48                          | 0.5   | -0.04 | 0.21  | 0.24  | -0.04 | -0.03 | -0    | -0.04 |       |       |       |       |       |
|     | <i>Ndn</i>     | 841                                                                                               | 31   | 804   | 9    | 775   | 28   | 795   | 30   | 875   | 14   | 895   | 20   | 785                           | 732  | 663   | 301  | 879   | 276  | 939   | 983  | 842   | 803  | 742   | 811  | 785                                                   | 876  | 0.46  | 0.49  | 0.47  | 0.46  | 0.48                          | 0.48  | 0.02  | 0.19  | 0.26  | -0.01 | 0.01  | -0.02 | -0.03 |       |       |       |       |       |
|     | <i>Magel2</i>  | 79                                                                                                | 0    | 77    | 1    | 74    | 1    | 92    | 3    | 102   | 3    | 84    | 8    | 89                            | 91   | 101   | 61   | 87    | 26   | 88    | 84   | 82    | 50   | 97    | 75   | 81                                                    | 95   | 0.5   | 0.49  | 0.49  | 0.47  | 0.47                          | 0.41  | -0.01 | 0.12  | 0.27  | 0.01  | 0.12  | 0.06  | -0.04 |       |       |       |       |       |
|     | <i>Mkm3</i>    | 90                                                                                                | 0    | 59    | 0    | 46    | 2    | 77    | 2    | 64    | 0    | 60    | 2    | 55                            | 63   | 51    | 53   | 74    | 25   | 92    | 86   | 97    | 69   | 83    | 51   | 77                                                    | 67   | 0.5   | 0.5   | 0.46  | 0.47  | 0.5                           | 0.47  | -0.03 | -0.01 | 0.25  | 0.02  | 0.08  | 0.12  | 0.03  |       |       |       |       |       |
|     | <i>Peg12</i>   | 134                                                                                               | 8    | 117   | 3    | 98    | 4    | 127   | 6    | 112   | 2    | 129   | 4    | 116                           | 88   | 99    | 41   | 143   | 28   | 187   | 142  | 168   | 169  | 127   | 128  | 128                                                   | 120  | 0.44  | 0.48  | 0.46  | 0.45  | 0.48                          | 0.47  | 0.07  | 0.21  | 0.34  | 0.07  | -0    | -0    | 0.02  |       |       |       |       |       |
|     | <i>Impact</i>  | 489                                                                                               | 69   | 492   | 67   | 393   | 63   | 465   | 75   | 552   | 79   | 499   | 90   | 533                           | 76   | 534   | 87   | 525   | 128  | 641   | 294  | 590   | 354  | 555   | 430  | 610                                                   | 483  | 0.38  | 0.38  | 0.36  | 0.36  | 0.37                          | 0.35  | 0.38  | 0.36  | 0.3   | 0.19  | 0.13  | 0.06  | 0.06  |       |       |       |       |       |
|     | <i>Zim1</i>    | 1                                                                                                 | 311  | 10    | 392  | 10    | 338  | 2     | 319  | 4     | 377  | 14    | 365  | 12                            | 390  | 5     | 328  | 2     | 312  | 5     | 64   | 1     | 4    | 2     | 31   | 3                                                     | 3    | -0.5  | -0.48 | -0.47 | -0.49 | -0.49                         | -0.46 | -0.47 | -0.48 | -0.49 | -0.43 | -0.3  | -0.44 | 0     |       |       |       |       |       |
|     | <i>Peg3</i>    | 205                                                                                               | 8    | 166   | 5    | 150   | 4    | 172   | 8    | 262   | 8    | 223   | 6    | 200                           | 3    | 170   | 2    | 212   | 39   | 212   | 156  | 172   | 187  | 201   | 156  | 186                                                   | 235  | 0.46  | 0.47  | 0.47  | 0.46  | 0.47                          | 0.47  | 0.49  | 0.49  | 0.34  | 0.08  | -0.02 | 0.06  | -0.06 |       |       |       |       |       |
|     | <i>Inpp5f</i>  | 685                                                                                               | 162  | 633   | 167  | 555   | 163  | 613   | 144  | 702   | 165  | 651   | 160  | 567                           | 171  | 706   | 176  | 710   | 170  | 748   | 889  | 614   | 748  | 610   | 782  | 706                                                   | 829  | 0.31  | 0.29  | 0.27  | 0.31  | 0.31                          | 0.3   | 0.27  | 0.3   | 0.31  | -0.04 | -0.05 | -0.06 | -0.04 |       |       |       |       |       |
|     | <i>Zdbf2</i>   | 53                                                                                                | 8    | 52    | 7    | 34    | 4    | 47    | 7    | 70    | 13   | 76    | 16   | 72                            | 12   | 40    | 32   | 59    | 31   | 55    | 74   | 64    | 94   | 49    | 77   | 62                                                    | 64   | 0.37  | 0.38  | 0.39  | 0.37  | 0.34                          | 0.33  | 0.36  | 0.06  | 0.16  | -0.07 | -0.09 | -0.11 | -0.01 |       |       |       |       |       |
|     | <i>Begain</i>  | 17                                                                                                | 11   | 20    | 13   | 20    | 11   | 21    | 8    | 25    | 7    | 19    | 13   | 37                            | 11   | 25    | 15   | 34    | 9    | 17    | 18   | 15    | 10   | 14    | 18   | 17                                                    | 10   | 0.11  | 0.11  | 0.15  | 0.22  | 0.28                          | 0.09  | 0.27  | 0.13  | 0.29  | -0.01 | 0.1   | -0.06 | 0.13  |       |       |       |       |       |
|     | <i>Dio3os</i>  | 17                                                                                                | 7    | 20    | 5    | 15    | 0    | 9     | 10   | 11    | 3    | 13    | 4    | 13                            | 1    | 16    | 5    | 15    | 6    | 2     | 7    | 6     | 5    | 1     | 5    | 5                                                     | 8    | 0.21  | 0.3   | 0.5   | -0.03 | 0.29                          | 0.26  | 0.43  | 0.26  | 0.21  | -0.28 | 0.05  | -0.33 | -0.12 |       |       |       |       |       |
|     | <i>Dlk1</i>    | 1595                                                                                              | 143  | 2152  | 208  | 2120  | 181  | 1504  | 113  | 1648  | 152  | 1737  | 143  | 1660                          | 133  | 1864  | 152  | 1417  | 131  | 230   | 198  | 152   | 152  | 202   | 162  | 248                                                   | 204  | 0.42  | 0.41  | 0.42  | 0.43  | 0.42                          | 0.42  | 0.43  | 0.42  | 0.42  | 0.04  | 0     | 0.05  | 0.05  |       |       |       |       |       |
|     | <i>Rian</i>    | 23                                                                                                | 3219 | 53    | 3417 | 39    | 3216 | 41    | 3350 | 29    | 3877 | 25    | 3619 | 50                            | 3342 | 58    | 3711 | 345   | 3336 | 3106  | 3705 | 2484  | 3049 | 2450  | 3047 | 3371                                                  | 4139 | -0.49 | -0.48 | -0.49 | -0.49 | -0.49                         | -0.49 | -0.49 | -0.48 | -0.41 | -0.04 | -0.05 | -0.05 | -0.05 |       |       |       |       |       |
|     | <i>Meg3</i>    | 4                                                                                                 | 4358 | 19    | 3811 | 28    | 3789 | 20    | 3772 | 33    | 4336 | 25    | 4235 | 58                            | 4293 | 68    | 5155 | 502   | 4352 | 4117  | 3875 | 3764  | 3649 | 3679  | 3539 | 5745                                                  | 5486 | -0.5  | -0.5  | -0.49 | -0.49 | -0.49                         | -0.49 | -0.49 | -0.49 | -0.4  | 0.02  | 0.01  | 0.01  | 0.01  |       |       |       |       |       |
|     | <i>Phactr2</i> | 334                                                                                               | 836  | 334   | 888  | 338   | 806  | 388   | 960  | 444   | 1156 | 394   | 992  | 408                           | 912  | 378   | 891  | 440   | 1017 | 362   | 401  | 375   | 389  | 370   | 342  | 377                                                   | 379  | -0.21 | -0.23 | -0.2  | -0.21 | -0.22                         | -0.22 | -0.19 | -0.2  | -0.2  | -0.03 | -0.01 | 0.02  | -0    |       |       |       |       |       |
|     | <i>Hymai</i>   | 230                                                                                               | 0    | 210   | 1    | 209   | 1    | 174   | 3    | 262   | 0    | 258   | 0    | 224                           | 3    | 242   | 0    | 225   | 195  | 165   | 163  | 182   | 136  | 149   | 135  | 0.5                                                   | 0.5  | 0.5   | 0.48  | 0.5   | 0.5   | 0.49                          | 0.48  | 0.5   | 0.04  | 0     | 0.07  | 0.02  |       |       |       |       |       |       |       |
|     | <i>Plaql1</i>  | 5292                                                                                              | 47   | 5833  | 56   | 5583  | 90   | 5419  | 39   | 6600  | 36   | 6810  | 43   | 6028                          | 31   | 5246  | 94   | 6166  | 45   | 7056  | 8471 | 5711  | 6780 | 5304  | 6301 | 6412                                                  | 7625 | 0.49  | 0.49  | 0.48  | 0.49  | 0.49                          | 0.49  | 0.49  | 0.48  | 0.49  | -0.05 | -0.04 | -0.04 | -0.04 |       |       |       |       |       |
|     | <i>Peg5</i>    | 16                                                                                                | 4    | 12    | 0    | 9     | 2    | 7     | 3    | 11    | 7    | 13    | 5    | 18                            | 6    | 12    | 5    | 22    | 6    | 34    | 7    | 27    | 11   | 19    | 11   | 30                                                    | 7    | 0.3   | 0.5   | 0.32  | 0.2   | 0.11                          | 0.22  | 0.25  | 0.21  | 0.29  | 0.33  | 0.21  | 0.13  | 0.31  |       |       |       |       |       |
|     | <i>Mcts2</i>   | 148                                                                                               | 195  | 132   | 205  | 111   | 186  | 108   | 232  | 144   | 262  | 159   | 207  | 137                           | 215  | 132   | 212  | 159   | 196  | 167   | 202  | 146   | 199  | 143   | 213  | 156                                                   | 221  | -0.07 | -0.11 | -0.13 | -0.18 | -0.15                         | -0.07 | -0.11 | -0.12 | -0.05 | -0.05 | -0.08 | -0.1  | -0.09 |       |       |       |       |       |

Table S4. Allelic expression of some imprinted genes is shown with the calculated P-score of the imprinted gene based on the sequence reads of the paternal (P) and maternal (M) alleles in the male embryos.

| Reads of the imprinted genes on the paternal (P) or maternal (M) chromosome in the male embryos |                |                               |      |       |      |       |      |       |      |                               |      |       |      |       |      |       |      | P-scores of the imprinted genes in the male embryos |      |       |      |                               |       |       |       |                               |       |       |       |       |       |       |   |
|-------------------------------------------------------------------------------------------------|----------------|-------------------------------|------|-------|------|-------|------|-------|------|-------------------------------|------|-------|------|-------|------|-------|------|-----------------------------------------------------|------|-------|------|-------------------------------|-------|-------|-------|-------------------------------|-------|-------|-------|-------|-------|-------|---|
| ICR                                                                                             | Gene           | M <sup>+</sup> Z <sup>+</sup> |      |       |      |       |      |       |      | M <sup>-</sup> Z <sup>+</sup> |      |       |      |       |      |       |      | M <sup>+</sup> Z <sup>+</sup>                       |      |       |      | M <sup>-</sup> Z <sup>+</sup> |       |       |       | M <sup>-</sup> Z <sup>-</sup> |       |       |       |       |       |       |   |
|                                                                                                 |                | Emb 1                         |      | Emb 2 |      | Emb 3 |      | Emb 4 |      | Emb 1                         |      | Emb 2 |      | Emb 3 |      | Emb 1 |      | Emb 2                                               |      | Emb 3 |      | Emb 1                         |       | Emb 2 |       | Emb 3                         |       | Emb 1 |       | Emb 2 |       | Emb 3 |   |
|                                                                                                 |                | P                             | M    | P     | M    | P     | M    | P     | M    | P                             | M    | P     | M    | P     | M    | P     | M    | P                                                   | M    | P     | M    | P                             | M     | P     | M     | P                             | M     | P     | M     | P     | M     | P     | M |
|                                                                                                 | <i>Kcnk9</i>   | 0                             | 71   | 0     | 46   | 1     | 80   | 0     | 68   | 0                             | 74   | 0     | 63   | 0     | 64   | 1     | 32   | 0                                                   | 6    | 4     | 40   | -0.5                          | -0.5  | -0.49 | -0.5  | -0.5                          | -0.5  | -0.5  | -0.47 | -0.5  | -0.41 |       |   |
| <b>Peg13</b>                                                                                    | <i>Peg13</i>   | 507                           | 0    | 313   | 1    | 377   | 1    | 368   | 0    | 371                           | 15   | 374   | 0    | 377   | 0    | 301   | 118  | 227                                                 | 199  | 344   | 68   | 0.5                           | 0.497 | 0.497 | 0.5   | 0.461                         | 0.5   | 0.5   | 0.218 | 0.033 | 0.335 |       |   |
|                                                                                                 | <i>Trappc9</i> | 21                            | 52   | 25    | 15   | 26    | 18   | 28    | 25   | 15                            | 22   | 15    | 27   | 32    | 40   | 32    | 30   | 15                                                  | 23   | 25    | 28   | -0.21                         | 0.125 | 0.091 | 0.028 | -0.09                         | -0.14 | -0.06 | 0.016 | -0.11 | -0.03 |       |   |
|                                                                                                 | <i>Atp10a</i>  | 51                            | 32   | 30    | 25   | 35    | 31   | 43    | 32   | 20                            | 36   | 28    | 24   | 36    | 38   | 31    | 13   | 34                                                  | 39   | 41    | 38   | 0.114                         | 0.045 | 0.03  | 0.073 | -0.14                         | 0.038 | -0.01 | 0.205 | -0.03 | 0.019 |       |   |
|                                                                                                 | <i>Ube3a</i>   | 788                           | 987  | 558   | 631  | 520   | 635  | 470   | 596  | 460                           | 483  | 404   | 502  | 454   | 496  | 482   | 448  | 400                                                 | 408  | 393   | 399  | -0.06                         | -0.03 | -0.05 | -0.06 | -0.01                         | -0.05 | -0.02 | 0.018 | -0    | -0    |       |   |
|                                                                                                 | <i>Snord64</i> | 20                            | 0    | 14    | 0    | 15    | 0    | 9     | 0    | 14                            | 15   | 5     | 10   | 11    | 12   | 8     | 10   | 6                                                   | 15   | 4     | 7    | 0.5                           | 0.5   | 0.5   | 0.5   | -0.02                         | -0.17 | -0.02 | -0.06 | -0.21 | -0.14 |       |   |
| <b>Snrpn</b>                                                                                    | <i>Snrpn</i>   | 911                           | 5    | 678   | 4    | 734   | 1    | 637   | 3    | 567                           | 365  | 636   | 469  | 670   | 380  | 595   | 540  | 671                                                 | 816  | 583   | 607  | 0.495                         | 0.494 | 0.499 | 0.495 | 0.108                         | 0.076 | 0.138 | 0.024 | -0.05 | -0.01 |       |   |
|                                                                                                 | <i>Ndn</i>     | 1147                          | 5    | 691   | 4    | 925   | 14   | 795   | 4    | 781                           | 502  | 799   | 600  | 796   | 489  | 662   | 687  | 878                                                 | 908  | 857   | 898  | 0.496                         | 0.494 | 0.485 | 0.495 | 0.109                         | 0.071 | 0.119 | -0.01 | -0.01 | -0.01 |       |   |
|                                                                                                 | <i>Magel2</i>  | 106                           | 0    | 71    | 1    | 70    | 1    | 128   | 0    | 85                            | 69   | 99    | 60   | 99    | 42   | 57    | 68   | 72                                                  | 74   | 82    | 95   | 0.5                           | 0.486 | 0.486 | 0.5   | 0.052                         | 0.123 | 0.202 | -0.04 | -0.01 | -0.04 |       |   |
|                                                                                                 | <i>Mkrr3</i>   | 99                            | 1    | 58    | 0    | 76    | 0    | 68    | 1    | 63                            | 29   | 65    | 43   | 59    | 44   | 76    | 76   | 53                                                  | 43   | 53    | 73   | 0.49                          | 0.5   | 0.5   | 0.486 | 0.185                         | 0.102 | 0.073 | 0     | 0.052 | -0.08 |       |   |
|                                                                                                 | <i>Peg12</i>   | 170                           | 3    | 90    | 0    | 103   | 1    | 137   | 2    | 114                           | 70   | 125   | 82   | 118   | 67   | 129   | 118  | 97                                                  | 76   | 109   | 136  | 0.483                         | 0.5   | 0.49  | 0.486 | 0.12                          | 0.104 | 0.138 | 0.022 | 0.061 | -0.06 |       |   |
| <b>Impact</b>                                                                                   | <i>Impact</i>  | 646                           | 87   | 474   | 63   | 507   | 63   | 467   | 66   | 396                           | 69   | 382   | 237  | 439   | 151  | 471   | 324  | 434                                                 | 330  | 386   | 210  | 0.381                         | 0.383 | 0.389 | 0.376 | 0.352                         | 0.117 | 0.244 | 0.092 | 0.068 | 0.148 |       |   |
| <b>Peg3</b>                                                                                     | <i>Zim1</i>    | 2                             | 367  | 11    | 269  | 2     | 333  | 7     | 399  | 15                            | 316  | 1     | 370  | 5     | 382  | 2     | 26   | 0                                                   | 6    | 3     | 22   | -0.49                         | -0.46 | -0.49 | -0.48 | -0.45                         | -0.5  | -0.49 | -0.43 | -0.5  | -0.38 |       |   |
|                                                                                                 | <i>Usp29</i>   | 259                           | 10   | 173   | 2    | 165   | 4    | 148   | 7    | 116                           | 27   | 158   | 9    | 154   | 7    | 114   | 142  | 145                                                 | 149  | 122   | 106  | 0.463                         | 0.489 | 0.476 | 0.455 | 0.311                         | 0.446 | 0.457 | -0.05 | -0.01 | 0.035 |       |   |
| <b>Inpp5f</b>                                                                                   | <i>Inpp5f</i>  | 833                           | 223  | 553   | 165  | 633   | 147  | 599   | 152  | 530                           | 154  | 510   | 144  | 497   | 178  | 477   | 622  | 525                                                 | 678  | 545   | 685  | 0.289                         | 0.27  | 0.312 | 0.298 | 0.275                         | 0.28  | 0.236 | -0.07 | -0.06 | -0.06 |       |   |
| <b>Zdbf2</b>                                                                                    | <i>Zdbf2</i>   | 79                            | 14   | 37    | 6    | 41    | 3    | 46    | 19   | 38                            | 29   | 32    | 36   | 41    | 23   | 26    | 62   | 54                                                  | 58   | 38    | 50   | 0.349                         | 0.36  | 0.432 | 0.208 | 0.067                         | -0.03 | 0.141 | -0.2  | -0.02 | -0.07 |       |   |
|                                                                                                 | <i>Begain</i>  | 18                            | 13   | 16    | 9    | 23    | 8    | 27    | 10   | 36                            | 13   | 22    | 8    | 30    | 10   | 8     | 7    | 16                                                  | 10   | 8     | 11   | 0.081                         | 0.14  | 0.242 | 0.23  | 0.235                         | 0.233 | 0.25  | 0.033 | 0.115 | -0.08 |       |   |
|                                                                                                 | <i>Dio3os</i>  | 17                            | 6    | 15    | 4    | 17    | 6    | 11    | 6    | 13                            | 5    | 18    | 2    | 12    | 8    | 4     | 4    | 3                                                   | 2    | 5     | 8    | 0.239                         | 0.289 | 0.239 | 0.147 | 0.222                         | 0.4   | 0.1   | 0     | 0.1   | -0.12 |       |   |
| <b>IG-DMR</b>                                                                                   | <i>Dlk1</i>    | 2411                          | 182  | 1734  | 181  | 2312  | 194  | 1932  | 172  | 1890                          | 152  | 1722  | 139  | 1765  | 145  | 137   | 119  | 150                                                 | 151  | 205   | 240  | 0.43                          | 0.405 | 0.423 | 0.418 | 0.426                         | 0.425 | 0.424 | 0.035 | -0    | -0.04 |       |   |
|                                                                                                 | <i>Rian</i>    | 25                            | 4000 | 14    | 3154 | 21    | 3183 | 30    | 3445 | 122                           | 3410 | 31    | 2948 | 81    | 3082 | 2243  | 2675 | 2577                                                | 3065 | 2282  | 2818 | -0.49                         | -0.5  | -0.49 | -0.49 | -0.47                         | -0.49 | -0.47 | -0.04 | -0.04 | -0.05 |       |   |
|                                                                                                 | <i>Meg3</i>    | 4                             | 4426 | 6     | 3881 | 6     | 3264 | 23    | 5643 | 197                           | 5177 | 18    | 4318 | 172   | 4660 | 4663  | 4200 | 4634                                                | 4207 | 3916  | 3392 | -0.5                          | -0.5  | -0.5  | -0.5  | -0.46                         | -0.5  | -0.46 | 0.026 | 0.024 | 0.036 |       |   |
| <b>Zac1</b>                                                                                     | <i>Phacr2</i>  | 514                           | 1240 | 367   | 943  | 329   | 910  | 390   | 895  | 324                           | 823  | 278   | 773  | 317   | 811  | 317   | 343  | 264                                                 | 270  | 287   | 297  | -0.21                         | -0.22 | -0.23 | -0.2  | -0.22                         | -0.24 | -0.22 | -0.02 | -0.01 | -0.01 |       |   |
|                                                                                                 | <i>Hymai</i>   | 276                           | 2    | 188   | 4    | 211   | 0    | 175   | 0    | 227                           | 0    | 191   | 0    | 201   | 0    | 133   | 98   | 144                                                 | 134  | 188   | 168  | 0.493                         | 0.479 | 0.5   | 0.5   | 0.5                           | 0.5   | 0.5   | 0.076 | 0.018 | 0.028 |       |   |
|                                                                                                 | <i>Plagl1</i>  | 7235                          | 63   | 5131  | 64   | 5957  | 59   | 6560  | 51   | 6173                          | 41   | 5418  | 22   | 6065  | 41   | 4418  | 5877 | 5173                                                | 6156 | 6206  | 7345 | 0.491                         | 0.488 | 0.49  | 0.492 | 0.493                         | 0.496 | 0.493 | -0.07 | -0.04 | -0.04 |       |   |
| <b>Peg5</b>                                                                                     | <i>Nnat</i>    | 15                            | 6    | 16    | 2    | 10    | 2    | 29    | 6    | 13                            | 14   | 20    | 8    | 12    | 11   | 30    | 23   | 42                                                  | 14   | 19    | 5    | 0.214                         | 0.389 | 0.333 | 0.329 | -0.02                         | 0.214 | 0.022 | 0.066 | 0.25  | 0.292 |       |   |
| <b>Mcts2</b>                                                                                    | <i>H13</i>     | 187                           | 308  | 136   | 201  | 119   | 212  | 110   | 190  | 119                           | 134  | 147   | 150  | 182   | 142  | 137   | 160  | 82                                                  | 189  | 114   | 132  | -0.12                         | -0.1  | -0.14 | -0.13 | -0.03                         | -0.01 | 0.062 | -0.04 | -0.2  | -0.04 |       |   |

**Table S5. Transcript per million (TPM) values are used to measure the expression levels of some imprinted genes in the female embryos.**

| TPMs of the imprinted genes in the female embryos |          |                               |         |         |         |                               |         |         |         |                               |         |         |         | Reads of the imprinted genes in the female embryos |       |       |       |       |       |                               |       |       |        |        |        |                               |       |       |       |       |       |       |       |       |        |
|---------------------------------------------------|----------|-------------------------------|---------|---------|---------|-------------------------------|---------|---------|---------|-------------------------------|---------|---------|---------|----------------------------------------------------|-------|-------|-------|-------|-------|-------------------------------|-------|-------|--------|--------|--------|-------------------------------|-------|-------|-------|-------|-------|-------|-------|-------|--------|
| ICR                                               | Gene     | M <sup>+</sup> Z <sup>+</sup> |         |         |         | M <sup>-</sup> Z <sup>+</sup> |         |         |         | M <sup>-</sup> Z <sup>-</sup> |         |         |         | M <sup>+</sup> Z <sup>+</sup>                      |       |       |       |       |       | M <sup>-</sup> Z <sup>+</sup> |       |       |        |        |        | M <sup>-</sup> Z <sup>-</sup> |       |       |       |       |       |       |       |       |        |
|                                                   |          | Emb 1                         | Emb 2   | Emb 3   | Emb 4   | Emb 5                         | Emb 6   | Emb 7   | Emb 8   | Emb 9                         | Emb 10  | Emb 11  | Emb 12  | Emb 1                                              | Emb 2 | Emb 3 | Emb 4 | Emb 5 | Emb 6 | Emb 7                         | Emb 8 | Emb 9 | Emb 10 | Emb 11 | Emb 12 | Emb 1                         | Emb 2 | Emb 3 | Emb 4 | Emb 5 | Emb 6 | Emb 7 | Emb 8 | Emb 9 | Emb 10 |
| Peg13                                             | Konk9    | 2.96791                       | 2.26637 | 2.99391 | 3.40285 | 3.88433                       | 3.25281 | 3.65612 | 4.0269  | 4.32991                       | 3.22365 | 1.1695  | 1.6153  | 2.1479                                             | 190   | 168   | 180   | 213   | 249   | 202                           | 220   | 248   | 265    | 229    | 76     | 98                            | 157   |       |       |       |       |       |       |       |        |
|                                                   | Peg13    | 46.1575                       | 45.7904 | 44.4469 | 44.4767 | 51.7617                       | 46.207  | 48.9431 | 44.0311 | 53.6505                       | 46.0617 | 70.9372 | 71.5135 | 50.9483                                            | 1798  | 1736  | 1626  | 1694  | 2019  | 1746                          | 1792  | 1650  | 1998   | 1991   | 2805   | 2640                          | 2266  |       |       |       |       |       |       |       |        |
|                                                   | Trappc9  | 9.82761                       | 9.88802 | 9.4506  | 12.1726 | 11.7162                       | 11.6736 | 10.3651 | 9.79158 | 11.8268                       | 11.6606 | 10.3514 | 9.81384 | 9.66456                                            | 578   | 566   | 522   | 700   | 690   | 666                           | 573   | 554   | 665    | 761    | 618    | 547                           | 649   |       |       |       |       |       |       |       |        |
| Snrpn                                             | Atp10a   | 2.83774                       | 2.7107  | 3.13966 | 2.90228 | 3.58672                       | 3.4739  | 3.3257  | 2.81155 | 3.6871                        | 3.35651 | 3.40703 | 3.22829 | 2.81545                                            | 128   | 119   | 133   | 128   | 162   | 152                           | 141   | 122   | 159    | 168    | 156    | 138                           | 145   |       |       |       |       |       |       |       |        |
|                                                   | Ube3a    | 53.1838                       | 54.4557 | 48.456  | 59.0664 | 67.6303                       | 65.1971 | 61.5554 | 52.1088 | 61.483                        | 55.2146 | 56.219  | 51.3116 | 50.2816                                            | 4039  | 4025  | 3456  | 4386  | 5143  | 4803                          | 4394  | 3807  | 4464   | 4653   | 4334   | 3693                          | 4360  |       |       |       |       |       |       |       |        |
|                                                   | Snord64  | 44.8086                       | 40.6234 | 53.3255 | 53.915  | 73.7038                       | 48.9098 | 151.428 | 112.336 | 88.2243                       | 144.897 | 135.022 | 86.2196 | 106.191                                            | 17    | 15    | 19    | 20    | 28    | 18                            | 54    | 41    | 32     | 61     | 52     | 31                            | 46    |       |       |       |       |       |       |       |        |
|                                                   | Snrpn    | 46.6289                       | 51.5885 | 52.0448 | 49.0813 | 51.0578                       | 51.8816 | 97.9578 | 67.2621 | 68.7032                       | 93.9082 | 93.5313 | 98.155  | 86.3677                                            | 1576  | 1697  | 1652  | 1622  | 1728  | 1701                          | 3112  | 2187  | 2220   | 3522   | 3209   | 3144                          | 3333  |       |       |       |       |       |       |       |        |
|                                                   | Snrnf    | 92.8559                       | 102.746 | 103.539 | 97.853  | 100.704                       | 103.582 | 193.109 | 132.774 | 135.549                       | 186.185 | 185.018 | 192.351 | 171.01                                             | 1547  | 1666  | 1620  | 1594  | 1680  | 1674                          | 3024  | 2128  | 2159   | 3442   | 3129   | 3037                          | 3253  |       |       |       |       |       |       |       |        |
|                                                   | Ndn      | 294.488                       | 293.45  | 307.081 | 281.658 | 290.061                       | 308.58  | 544.496 | 387.649 | 390.914                       | 563.274 | 545.269 | 584.752 | 532.692                                            | 4010  | 3889  | 3927  | 3750  | 3955  | 4076                          | 6969  | 5078  | 5089   | 8511   | 7537   | 7546                          | 8282  |       |       |       |       |       |       |       |        |
|                                                   | Ipw      | 1.48668                       | 1.52753 | 2.63836 | 1.1826  | 1.81462                       | 2.21375 | 5.62374 | 4.12106 | 2.76452                       | 2.38183 | 5.04458 | 4.18328 | 2.74882                                            | 9     | 9     | 15    | 7     | 11    | 13                            | 32    | 24    | 16     | 16     | 31     | 24                            | 19    |       |       |       |       |       |       |       |        |
|                                                   | Magel2   | 11.5993                       | 10.9293 | 12.1848 | 14.1507 | 14.6226                       | 14.1293 | 28.7208 | 25.1693 | 21.5179                       | 24.6798 | 25.9535 | 28.7053 | 27.5158                                            | 446   | 409   | 440   | 532   | 563   | 527                           | 1038  | 931   | 791    | 1053   | 1013   | 1046                          | 1208  |       |       |       |       |       |       |       |        |
|                                                   | Mkx3     | 8.85325                       | 8.12363 | 7.76337 | 9.2967  | 7.56485                       | 8.93146 | 15.4632 | 12.3034 | 11.885                        | 19.1568 | 20.0082 | 18.1842 | 15.9224                                            | 187   | 167   | 154   | 192   | 160   | 183                           | 307   | 250   | 240    | 449    | 429    | 364                           | 384   |       |       |       |       |       |       |       |        |
|                                                   | Pegm12   | 23.1471                       | 19.8193 | 18.4364 | 24.1433 | 21.6944                       | 23.4833 | 47.9821 | 31.9863 | 34.8281                       | 46.9348 | 57.4591 | 49.0432 | 45.1714                                            | 504   | 420   | 377   | 514   | 473   | 496                           | 982   | 670   | 725    | 1134   | 1270   | 1012                          | 1123  |       |       |       |       |       |       |       |        |
| Impact                                            | Impact   | 30.9197                       | 31.0878 | 28.3161 | 34.2393 | 37.565                        | 37.8329 | 39.2125 | 39.0681 | 42.6155                       | 53.9927 | 54.1054 | 61.12   | 60.5502                                            | 979   | 958   | 842   | 1060  | 1191  | 1162                          | 1167  | 1190  | 1290   | 1897   | 1739   | 1834                          | 2189  |       |       |       |       |       |       |       |        |
| Cdh15                                             | Cdh15    | 19.6179                       | 21.5591 | 19.5268 | 18.6683 | 19.8472                       | 24.972  | 20.7807 | 22.3433 | 21.1891                       | 19.4473 | 18.3596 | 22.0956 | 22.8219                                            | 460   | 492   | 430   | 428   | 466   | 568                           | 458   | 504   | 475    | 506    | 437    | 491                           | 611   |       |       |       |       |       |       |       |        |
| Peg3                                              | Zim1     | 55.2035                       | 71.2386 | 71.3925 | 67.8288 | 81.0691                       | 79.7219 | 81.1328 | 66.5278 | 67.1605                       | 10.4866 | 0.92115 | 7.63759 | 1.33459                                            | 1594  | 2002  | 1936  | 1915  | 2344  | 2233                          | 2202  | 1848  | 1854   | 336    | 27     | 209                           | 44    |       |       |       |       |       |       |       |        |
|                                                   | Usp29    | 8.0595                        | 7.52738 | 7.47615 | 8.26809 | 9.56301                       | 9.64219 | 9.06548 | 7.89811 | 11.2143                       | 15.4843 | 18.3552 | 17.7391 | 16.2538                                            | 978   | 889   | 852   | 981   | 1162  | 1135                          | 1034  | 922   | 1301   | 2085   | 2261   | 2040                          | 2252  |       |       |       |       |       |       |       |        |
|                                                   | Peg3     | 287.266                       | 273.437 | 263.879 | 291.965 | 328.377                       | 312.14  | 327.394 | 252.071 | 386.652                       | 499.6   | 592.687 | 543.257 | 483.519                                            | 15694 | 14539 | 13539 | 15596 | 17964 | 16542                         | 16812 | 13248 | 20195  | 30287  | 32869  | 28127                         | 30161 |       |       |       |       |       |       |       |        |
|                                                   | Peg3os   | 6.58798                       | 3.88858 | 5.67162 | 8.02803 | 9.93876                       | 10.8374 | 9.24585 | 6.55677 | 13.1954                       | 17.811  | 20.9888 | 14.6427 | 12.0309                                            | 47    | 27    | 38    | 56    | 71    | 75                            | 62    | 45    | 90     | 141    | 152    | 99                            | 98    |       |       |       |       |       |       |       |        |
| Inpp5f                                            | Inpp5f   | 39.144                        | 41.1691 | 37.7447 | 41.0036 | 44.5342                       | 42.7468 | 41.8218 | 43.424  | 45.5292                       | 73.3496 | 70.0503 | 74.608  | 67.9648                                            | 1652  | 1691  | 1496  | 1692  | 1882  | 1750                          | 1659  | 1763  | 1837   | 3435   | 3001   | 2984                          | 3275  |       |       |       |       |       |       |       |        |
| Zdbf2                                             | Zdbf2    | 20.2171                       | 20.3171 | 17.7901 | 21.3192 | 25.9547                       | 24.3547 | 29.1928 | 26.7662 | 29.8895                       | 36.7966 | 48.3575 | 43.9814 | 39.8783                                            | 2189  | 2141  | 1809  | 2257  | 2814  | 2558                          | 2971  | 2788  | 3094   | 4421   | 5315   | 4513                          | 4930  |       |       |       |       |       |       |       |        |
| Zrsr1                                             | Zrsr1    | 9.31215                       | 9.26296 | 8.651   | 6.98422 | 7.70932                       | 8.01371 | 8.12677 | 7.99647 | 10.7003                       | 12.7704 | 15.4754 | 16.3768 | 14.0895                                            | 345   | 334   | 301   | 253   | 286   | 288                           | 283   | 285   | 379    | 525    | 582    | 575                           | 596   |       |       |       |       |       |       |       |        |
| Commd1                                            | Commd1   | 99.4365                       | 97.2291 | 87.2762 | 90.185  | 88.6472                       | 81.1116 | 83.4597 | 86.5428 | 80.3372                       | 77.987  | 88.138  | 86.6123 | 82.8783                                            | 848   | 807   | 699   | 752   | 757   | 671                           | 669   | 710   | 655    | 738    | 763    | 700                           | 807   |       |       |       |       |       |       |       |        |
| Peg10                                             | Calcr    | 1.02436                       | 0.63788 | 1.45432 | 1.17465 | 1.42599                       | 1.568   | 0.89167 | 0.61308 | 1.20134                       | 0.81124 | 0.82564 | 0.91712 | 0.46217                                            | 33    | 20    | 44    | 37    | 46    | 49                            | 27    | 19    | 37     | 29     | 27     | 28                            | 17    |       |       |       |       |       |       |       |        |
| Zac1                                              | Plagl1   | 211.592                       | 247.804 | 243.267 | 230.244 | 274.55                        | 284.649 | 270.019 | 234.558 | 264.213                       | 538.802 | 477.368 | 492.276 | 491.064                                            | 9319  | 10622 | 10062 | 9915  | 12108 | 12161                         | 11178 | 9938  | 11125  | 26332  | 21342  | 20547                         | 24694 |       |       |       |       |       |       |       |        |
|                                                   | Hymai    | 17.0503                       | 16.7304 | 15.5762 | 14.4459 | 16.9557                       | 17.8983 | 17.2469 | 11.2924 | 17.8093                       | 29.3264 | 26.7659 | 28.4421 | 22.8722                                            | 711   | 679   | 610   | 589   | 708   | 724                           | 676   | 453   | 710    | 1357   | 1133   | 1124                          | 1089  |       |       |       |       |       |       |       |        |
|                                                   | Phactr2  | 21.6426                       | 22.6093 | 21.4174 | 24.9051 | 28.9388                       | 26.7899 | 25.5221 | 23.8216 | 27.1402                       | 13.3048 | 14.0288 | 13.8947 | 12.5193                                            | 1614  | 1641  | 1500  | 1816  | 2161  | 1938                          | 1789  | 1709  | 1935   | 1101   | 1062   | 982                           | 1066  |       |       |       |       |       |       |       |        |
| IG-DMR                                            | Begain   | 15.0731                       | 16.4077 | 16.6719 | 14.6192 | 16.3754                       | 14.6955 | 16.4506 | 21.62   | 18.4143                       | 11.7936 | 10.7433 | 11.7952 | 10.4724                                            | 387   | 410   | 402   | 367   | 421   | 366                           | 397   | 534   | 452    | 336    | 280    | 287                           | 307   |       |       |       |       |       |       |       |        |
|                                                   | Dio3     | 7.26962                       | 7.00254 | 7.1878  | 5.77537 | 6.15796                       | 7.49415 | 5.93872 | 5.53261 | 5.70294                       | 2.69071 | 2.04613 | 1.43828 | 1.59173                                            | 112   | 105   | 104   | 87    | 95    | 112                           | 86    | 82    | 84     | 46     | 32     | 21                            | 28    |       |       |       |       |       |       |       |        |
|                                                   | Dio3os   | 2.74915                       | 3.1169  | 1.91788 | 2.13299 | 1.79876                       | 2.44315 | 1.51284 | 2.66064 | 2.67725                       | 1.02517 | 1.12065 | 0.70021 | 1.07935                                            | 29    | 32    | 19    | 22    | 19    | 25                            | 15    | 27    | 27     | 12     | 12     | 7                             | 13    |       |       |       |       |       |       |       |        |
|                                                   | Dlk1     | 251.919                       | 335.904 | 347.676 | 252.468 | 281.332                       | 321.429 | 301.157 | 304.702 | 257.599                       | 55.9618 | 48.9092 | 55.5527 | 59.0662                                            | 9996  | 12972 | 12956 | 9795  | 11178 | 12372                         | 11232 | 11631 | 9772   | 2464   | 1970   | 2089                          | 2676  |       |       |       |       |       |       |       |        |
|                                                   | Rian     | 473.334                       | 512.411 | 527.923 | 488.603 | 533.396                       | 519.419 | 529.35  | 564.29  | 548.253                       | 918.154 | 853.686 | 910.763 | 1032.48                                            | 13972 | 14721 | 14635 | 14102 | 15766 | 14873                         | 14687 | 16024 | 15472  | 30074  | 25580  | 25478                         | 34798 |       |       |       |       |       |       |       |        |
|                                                   | Rtl1     | 3.75678                       | 5.81941 | 5.21858 | 2.88655 | 4.53259                       | 5.22928 | 4.54463 | 5.33243 | 4.12901                       | 0.08593 | 0.18786 | 0.08049 | 0.36744                                            | 197   | 297   | 257   | 148   | 238   | 266                           | 224   | 269   | 207    | 5      | 10     | 4                             | 22    |       |       |       |       |       |       |       |        |
|                                                   | AF357359 | 5302.53                       | 5946.55 | 6360.52 | 5402.46 | 6421.53                       | 6412.07 | 6591.62 | 6906.75 | 6286.17                       | 10638.9 | 10487.1 | 10921.1 | 12679.2                                            | 1312  | 1432  | 1478  | 1307  | 1591  | 1539                          | 1533  | 1644  | 1487   | 2921   | 2634   | 2561                          | 3582  |       |       |       |       |       |       |       |        |
|                                                   | AF357426 | 66.9572                       | 29.7501 | 32.7577 | 53.6736 | 52.4099                       | 55.9664 | 44.2817 | 47.0282 | 49.2147                       | 70.1261 | 90.919  | 47.7383 | 115.701                                            | 37    | 16    | 17    | 29    | 29    | 30                            | 23    | 25    | 26     | 43     | 51     | 25                            | 73    |       |       |       |       |       |       |       |        |
|                                                   | Meg3     | 165.718                       | 149.973 | 157.324 | 164.261 | 177.59                        | 183.58  | 202.084 | 245.242 | 214.568                       | 305.281 | 306.148 | 332.733 | 440.608                                            | 17708 | 15597 | 15788 | 17162 | 19002 | 19029                         | 20297 | 25210 | 21920  | 36198  | 33208  | 33695                         | 53757 |       |       |       |       |       |       |       |        |
|                                                   | Mirg     | 45.6426                       | 45.5541 | 49.3954 | 51.0719 | 51.3609                       | 52.5369 | 62.8588 | 66.3652 | 56.7235                       | 107.5   | 109.328 | 113.756 | 146.003                                            | 489   | 475   | 497   | 535   | 551   | 546                           | 633   | 684   | 581    | 1278   | 1189   | 1155                          | 1786  |       |       |       |       |       |       |       |        |
| AF357355                                          | 49.5234  | 22.8101                       | 21.8204 | 29.6912 | 11.9379 | 21.1254                       | 41.787  | 21.3018 | 16.0761 | 43.0909                       | 30.2812 | 45.0488 | 25.426  | 29                                                 | 13    | 12    | 17    | 7     | 12    | 23                            | 12    | 9     | 28     | 18     | 25     | 17                            |       |       |       |       |       |       |       |       |        |
| AF357425                                          | 31.6296  | 19.8603                       | 28.0661 | 23.3632 | 59.665  | 25.3606                       | 26.1728 | 32.8789 | 23.8941 | 66.5099                       | 51.9316 | 40.792  | 47.709  | 18                                                 | 11    | 15    | 13    | 34    | 14    | 14                            | 18    | 13    | 42     | 30     | 22     | 31                            |       |       |       |       |       |       |       |       |        |
| Mir410                                            | 59.875   | 75.3623                       | 63.755  | 93.3861 | 91.1874 | 75.6122                       | 90.7739 | 77.7998 | 51.6684 | 167.272                       | 160.731 | 180.062 | 216.315 | 40                                                 | 49    | 40    | 61    | 61    | 49    | 57                            | 50    | 33    | 124    | 109    | 114    | 165                           |       |       |       |       |       |       |       |       |        |
| Mir431                                            | 7.9943   | 6.84497                       | 11.3498 | 13.6269 | 13.306  | 10.9883                       | 8.50513 | 12.4651 | 12.5429 | 9.60583                       | 6.56278 | 8.43552 | 19.8379 | 6                                                  | 5     | 8     | 10    | 10    | 8     | 6                             | 9     | 9     | 8      | 5      | 6      | 17                            |       |       |       |       |       |       |       |       |        |
| Mir335                                            | 22.2698  | 19.0681                       | 40.839  | 21.511  | 38.3024 | 25.5085                       | 23.6929 | 34.7241 | 33.6468 | 18.9544                       | 64.9685 | 40.4704 | 37.9254 |                                                    |       |       |       |       |       |                               |       |       |        |        |        |                               |       |       |       |       |       |       |       |       |        |

**Table S6. Transcript per million (TPM) values are used to measure the expression levels of some imprinted genes in the male embryos.**

|                 |                | TPMs of the imprinted genes in the male embryos |        |        |                               |        |        |                               |        |        | Reads of the imprinted genes in the male embryos |        |       |                               |       |       |                               |       |       |       |       |
|-----------------|----------------|-------------------------------------------------|--------|--------|-------------------------------|--------|--------|-------------------------------|--------|--------|--------------------------------------------------|--------|-------|-------------------------------|-------|-------|-------------------------------|-------|-------|-------|-------|
|                 |                | M <sup>+</sup> Z <sup>+</sup>                   |        |        | M <sup>-</sup> Z <sup>+</sup> |        |        | M <sup>-</sup> Z <sup>-</sup> |        |        | M <sup>+</sup> Z <sup>+</sup>                    |        |       | M <sup>-</sup> Z <sup>+</sup> |       |       | M <sup>-</sup> Z <sup>-</sup> |       |       |       |       |
| ICR             | Gene           | Emb 1                                           | Emb 2  | Emb 3  | Emb 4                         | Emb 1  | Emb 2  | Emb 3                         | Emb 1  | Emb 2  | Emb 3                                            | Emb 1  | Emb 2 | Emb 3                         | Emb 1 | Emb 2 | Emb 3                         | Emb 1 | Emb 2 | Emb 3 |       |
| <b>Peg13</b>    | <i>Kcnk9</i>   | 2.8236                                          | 3.3372 | 2.984  | 3.2471                        | 3.3853 | 3.0774 | 3.1755                        | 1.6128 | 0.2655 | 2.3264                                           | 246    | 200   | 189                           | 198   | 185   | 167                           | 196   | 91    | 17    | 142   |
|                 | <i>Peg13</i>   | 47.743                                          | 46.81  | 45.096 | 47.786                        | 50.072 | 44.73  | 48.087                        | 58.779 | 53.059 | 49.299                                           | 2531   | 1707  | 1738                          | 1773  | 1665  | 1477                          | 1806  | 2018  | 2067  | 1831  |
|                 | <i>Trappc9</i> | 10.32                                           | 9.844  | 10.139 | 10.907                        | 11.592 | 10.711 | 12.309                        | 10.823 | 9.6738 | 9.9506                                           | 826    | 542   | 590                           | 611   | 582   | 534                           | 698   | 561   | 569   | 558   |
| <b>Snrpn</b>    | <i>Atp10a</i>  | 3.0626                                          | 2.6997 | 2.913  | 4.0267                        | 3.2984 | 3.6353 | 3.3342                        | 2.6664 | 3.5247 | 4.0691                                           | 188    | 114   | 130                           | 173   | 127   | 139                           | 145   | 106   | 159   | 175   |
|                 | <i>Ube3a</i>   | 53.786                                          | 52.703 | 48.511 | 50.707                        | 46.014 | 47.75  | 44.537                        | 45.941 | 38.367 | 38.807                                           | 5559   | 3747  | 3645                          | 3668  | 2983  | 3074                          | 3261  | 3075  | 2914  | 2810  |
|                 | <i>Snord64</i> | 73.597                                          | 56.311 | 55.946 | 63.647                        | 142.04 | 87.064 | 87.483                        | 86.728 | 81.704 | 107.81                                           | 38     | 20    | 21                            | 23    | 46    | 28                            | 32    | 29    | 31    | 39    |
|                 | <i>Snrpn</i>   | 48.568                                          | 48.197 | 47.757 | 48.706                        | 77.95  | 90.609 | 80.462                        | 88.859 | 99.7   | 95.141                                           | 2234   | 1525  | 1597                          | 1568  | 2249  | 2596                          | 2622  | 2647  | 3370  | 3066  |
|                 | <i>Snrnf</i>   | 97.03                                           | 96.303 | 95.794 | 96.794                        | 153.15 | 178.93 | 159.31                        | 175.37 | 195.12 | 188.35                                           | 2200   | 1502  | 1579                          | 1536  | 2178  | 2527                          | 2559  | 2575  | 3251  | 2992  |
|                 | <i>lpw</i>     | 1.0924                                          | 2.1174 | 1.1687 | 2.7748                        | 2.7092 | 3.5076 | 4.2833                        | 1.8742 | 3.4686 | 3.6382                                           | 9      | 12    | 7                             | 16    | 14    | 18                            | 25    | 10    | 21    | 21    |
|                 | <i>Ndn</i>     | 289.72                                          | 275.66 | 293.27 | 282.27                        | 455.62 | 492    | 444.3                         | 519.03 | 592.75 | 567.96                                           | 5369   | 3514  | 3951                          | 3661  | 5296  | 5679                          | 5833  | 6229  | 8072  | 7374  |
|                 | <i>Magel2</i>  | 11.848                                          | 12.64  | 11.54  | 17.775                        | 27.877 | 27.92  | 24.574                        | 29.007 | 25.563 | 25.695                                           | 620    | 455   | 439                           | 651   | 915   | 910                           | 911   | 983   | 983   | 942   |
|                 | <i>Mkrr3</i>   | 9.0448                                          | 7.7375 | 8.6612 | 9.941                         | 14.032 | 16.755 | 14.78                         | 19.338 | 14.297 | 16.684                                           | 260    | 153   | 181                           | 200   | 253   | 300                           | 301   | 360   | 302   | 336   |
|                 | <i>Peg12</i>   | 21.699                                          | 18.888 | 16.897 | 22.903                        | 35.025 | 36.354 | 34.202                        | 51.432 | 32.56  | 40.654                                           | 643    | 385   | 364                           | 475   | 651   | 671                           | 718   | 987   | 709   | 844   |
|                 | <i>Impact</i>  | <i>Impact</i>                                   | 30.169 | 31.24  | 30.134                        | 32.959 | 31.412 | 41.841                        | 34.92  | 52.498 | 48.571                                           | 38.457 | 1300  | 926                           | 944   | 994   | 849                           | 1123  | 1066  | 1465  | 1538  |
| <b>Cdh15</b>    | <i>Cdh15</i>   | 16.327                                          | 18.04  | 20.777 | 21.94                         | 22.632 | 21.181 | 19.109                        | 20.42  | 15.352 | 19.368                                           | 521    | 396   | 482                           | 490   | 453   | 421                           | 432   | 422   | 360   | 433   |
| <b>Peg3</b>     | <i>Zim1</i>    | 50.767                                          | 55.787 | 56.601 | 83.154                        | 72.175 | 80.076 | 76.151                        | 6.2085 | 1.7315 | 4.4676                                           | 1995   | 1508  | 1617                          | 2287  | 1779  | 1960                          | 2120  | 158   | 50    | 123   |
|                 | <i>Usp29</i>   | 7.7507                                          | 7.8521 | 7.0382 | 7.5184                        | 8.8622 | 7.4856 | 7.3165                        | 14.867 | 13.876 | 12.731                                           | 1280   | 892   | 845                           | 869   | 918   | 770                           | 856   | 1590  | 1684  | 1473  |
|                 | <i>Peg3</i>    | 279.43                                          | 276.35 | 258.38 | 303.92                        | 337.04 | 277.02 | 279.08                        | 531.15 | 382.45 | 466.42                                           | 20776  | 14134 | 13966                         | 15815 | 15718 | 12829                         | 14700 | 25575 | 20896 | 24296 |
|                 | <i>Peg3os</i>  | 4.6348                                          | 4.3421 | 3.1168 | 13.097                        | 14.778 | 12.402 | 11.34                         | 19.403 | 17.099 | 20.582                                           | 45     | 29    | 22                            | 89    | 90    | 75                            | 78    | 122   | 122   | 140   |
| <b>Inpp5f</b>   | <i>Inpp5f</i>  | 39.453                                          | 39.206 | 38.486 | 38.609                        | 41.637 | 39.385 | 38.486                        | 63.932 | 63.403 | 67.124                                           | 2266   | 1549  | 1607                          | 1552  | 1500  | 1409                          | 1566  | 2378  | 2676  | 2701  |
| <b>Zdbf2</b>    | <i>Zdbf2</i>   | 20.149                                          | 17.59  | 16.896 | 18.956                        | 25.566 | 23.349 | 20.624                        | 39.265 | 32.332 | 27.762                                           | 2969   | 1783  | 1810                          | 1955  | 2363  | 2143                          | 2153  | 3747  | 3501  | 2866  |
| <b>Zrsr1</b>    | <i>Zrsr1</i>   | 9.282                                           | 8.8804 | 10.067 | 7.0278                        | 11.826 | 12.355 | 9.7705                        | 13.751 | 11.929 | 13.871                                           | 468    | 308   | 369                           | 248   | 374   | 388                           | 349   | 449   | 442   | 490   |
|                 | <i>Comm1d1</i> | 95.381                                          | 100.71 | 100.74 | 86.176                        | 90.937 | 88.808 | 93.527                        | 83.952 | 75.979 | 85.473                                           | 1107   | 804   | 850                           | 700   | 662   | 642                           | 769   | 631   | 648   | 695   |
| <b>Peg10</b>    | <i>Calcr</i>   | 0.7071                                          | 1.0611 | 0.753  | 1.0754                        | 1.1273 | 0.769  | 1.0303                        | 0.5987 | 0.8691 | 0.6511                                           | 31     | 32    | 24                            | 33    | 31    | 21                            | 32    | 17    | 28    | 20    |
| <b>Zac1</b>     | <i>Plagl1</i>  | 213.42                                          | 221    | 238.58 | 279.07                        | 284.07 | 255.51 | 247.09                        | 450.16 | 446.9  | 542.5                                            | 12792  | 9112  | 10396                         | 11707 | 10680 | 9539                          | 10492 | 17474 | 19684 | 22781 |
|                 | <i>Hymai</i>   | 14.379                                          | 15.062 | 16.07  | 15.584                        | 16.322 | 15.248 | 14.277                        | 24.76  | 22.66  | 28.823                                           | 816    | 588   | 663                           | 619   | 581   | 539                           | 574   | 910   | 945   | 1146  |
|                 | <i>Phactr2</i> | 22.721                                          | 24.551 | 21.767 | 24.96                         | 24.333 | 21.988 | 21.571                        | 13.739 | 10.231 | 10.632                                           | 2306   | 1714  | 1606                          | 1773  | 1549  | 1390                          | 1551  | 903   | 763   | 756   |
| <b>IG-DMR</b>   | <i>Begain</i>  | 14.538                                          | 13.896 | 15.274 | 19.914                        | 22.083 | 18.884 | 18.542                        | 11.401 | 12.385 | 10.58                                            | 508    | 334   | 388                           | 487   | 484   | 411                           | 459   | 258   | 318   | 259   |
|                 | <i>Dio3</i>    | 7.2017                                          | 4.992  | 7.3477 | 8.8588                        | 6.6152 | 9.0353 | 7.2707                        | 2.6512 | 2.012  | 2.5188                                           | 151    | 72    | 112                           | 130   | 87    | 118                           | 108   | 36    | 31    | 37    |
|                 | <i>Dio3os</i>  | 2.7863                                          | 2.2278 | 2.3954 | 2.1896                        | 2.5542 | 2.5721 | 2.3598                        | 1.1832 | 0.474  | 1.7896                                           | 40     | 22    | 25                            | 22    | 23    | 23                            | 24    | 11    | 5     | 18    |
|                 | <i>Dlk1</i>    | 279.7                                           | 276.34 | 355.72 | 340.82                        | 366.56 | 335.39 | 312.31                        | 45.351 | 47.679 | 71.631                                           | 15104  | 10265 | 13965                         | 12881 | 12416 | 11281                         | 11948 | 1586  | 1892  | 2710  |
|                 | <i>Rian</i>    | 450.53                                          | 498.45 | 495.95 | 563.7                         | 593.51 | 527.65 | 517.47                        | 909.67 | 935.48 | 897.22                                           | 18099  | 13774 | 14484                         | 15849 | 14955 | 13203                         | 14727 | 23666 | 27616 | 25252 |
|                 | <i>Rtl1</i>    | 4.0496                                          | 3.85   | 5.4933 | 4.5047                        | 5.6073 | 4.4993 | 4.1734                        | 0.2164 | 0.4386 | 0.32                                             | 289    | 189   | 285                           | 225   | 251   | 200                           | 211   | 10    | 23    | 16    |
|                 | <i>AF3573E</i> | 4882.2                                          | 5888.6 | 6045.7 | 6156.8                        | 6254.4 | 5664.1 | 5566.8                        | 9749   | 9076.6 | 10856                                            | 1644   | 1364  | 1480                          | 1451  | 1321  | 1188                          | 1328  | 2126  | 2246  | 2561  |
|                 | <i>AF3574E</i> | 15.957                                          | 36.728 | 21.949 | 66.497                        | 16.96  | 29.888 | 30.031                        | 61.598 | 162.86 | 43.653                                           | 12     | 19    | 12                            | 35    | 8     | 14                            | 16    | 30    | 90    | 23    |
|                 | <i>Meg3</i>    | 123.14                                          | 156.03 | 124.28 | 249.86                        | 264.22 | 220.4  | 214.58                        | 418.07 | 416    | 337.26                                           | 17907  | 15608 | 13139                         | 25431 | 24101 | 19964                         | 22107 | 39373 | 44456 | 34361 |
|                 | <i>Mirg</i>    | 44.1                                            | 52.644 | 43.963 | 58.796                        | 64.403 | 60.781 | 54.117                        | 110.99 | 100.8  | 103.28                                           | 643    | 528   | 466                           | 600   | 589   | 552                           | 559   | 1048  | 1080  | 1055  |
|                 | <i>AF3573E</i> | 16.312                                          | 14.593 | 27.617 | 17.929                        | 30.008 | 20.146 | 30.111                        | 21.313 | 122.95 | 19.702                                           | 13     | 8     | 16                            | 10    | 15    | 10                            | 17    | 11    | 72    | 11    |
|                 | <i>AF3574E</i> | 45.191                                          | 16.893 | 7.1043 | 44.276                        | 51.463 | 49.751 | 27.338                        | 61.806 | 158.14 | 40.545                                           | 35     | 9     | 4                             | 24    | 25    | 24                            | 15    | 31    | 90    | 22    |
|                 | <i>Mir410</i>  | 60.494                                          | 65.557 | 57.492 | 55.004                        | 87.677 | 95.356 | 63.655                        | 169.84 | 100.28 | 152.28                                           | 55     | 41    | 38                            | 35    | 50    | 54                            | 41    | 100   | 67    | 97    |
| <i>Mir431</i>   | 12.727         | 4.2697                                          | 6.7334 | 9.7918 | 10.926                        | 11.003 | 8.2916 | 27.211                        | 29.31  | 22.359 | 13                                               | 3      | 5     | 7                             | 7     | 6     | 18                            | 22    | 16    |       |       |
| <i>Mir335</i>   | 30.909         | 21.145                                          | 25.01  | 33.772 | 20.291                        | 13.136 | 32.081 | 58.958                        | 53.196 | 33.737 | 34                                               | 16     | 20    | 26                            | 14    | 9     | 25                            | 42    | 43    | 26    |       |
| <b>Peg5</b>     | <i>Nnat</i>    | 1504.1                                          | 1439.4 | 1258.1 | 1535.8                        | 1656.3 | 1700   | 1822.3                        | 2866.6 | 3336.7 | 2459.7                                           | 22555  | 14848 | 13716                         | 16119 | 15579 | 15879                         | 19360 | 27839 | 36769 | 25842 |
|                 | <i>Bicap</i>   | 68.213                                          | 66.294 | 67.088 | 78.2                          | 75.87  | 71.517 | 67.174                        | 42.093 | 36.291 | 43.313                                           | 1614   | 1079  | 1154                          | 1295  | 1126  | 1054                          | 1126  | 645   | 631   | 718   |
| <b>Igf2r</b>    | <i>Igf2r</i>   | 101.87                                          | 103.83 | 105.06 | 122.92                        | 122.44 | 110.11 | 109.53                        | 78.052 | 87.523 | 80.736                                           | 10210  | 7158  | 7655                          | 8622  | 7697  | 6874                          | 7777  | 5066  | 6446  | 5669  |
|                 | <i>Slc22a3</i> | 1.324                                           | 1.7397 | 1.7162 | 1.3824                        | 1.2584 | 1.5534 | 1.7252                        | 0.9829 | 0.8662 | 1.163                                            | 52     | 47    | 49                            | 38    | 31    | 38                            | 48    | 25    | 25    | 32    |
| <b>Kcnq1ot1</b> | <i>Asc1</i>    | 0.3869                                          | 0.3214 | 0.2281 | 0.3948                        | 0.2643 | 0.5324 | 1.0142                        | 1.3654 | 2.7075 | 0.8677                                           | 7      | 4     | 3                             | 5     | 3     | 6                             | 13    | 16    | 36    | 11    |
|                 | <i>Th</i>      | 4.2472                                          | 6.6101 | 5.4985 | 8.0674                        | 8.0458 | 6.3374 | 7.7584                        | 8.8729 | 9.5875 | 6.8468                                           | 85     | 91    | 80                            | 113   | 101   | 79                            | 110   | 115   | 141   | 96    |
|                 | <i>Xlr3b</i>   | 4.1322                                          | 3.8446 | 6.4419 | 7.4786                        | 7.3785 | 9.2879 | 6.3773                        | 7.3166 | 11.022 | 11.324                                           | 75     | 48    | 85                            | 95    | 84    | 105                           | 82    | 86    | 147   | 144   |
|                 | <i>Ampd3</i>   | 7.7754                                          | 7.518  | 9.8745 | 8.3709                        | 9.5998 | 8.3318 | 7.3254                        | 5.8356 | 2.4115 | 7.5881                                           | 430    | 286   | 397                           | 324   | 333   | 287                           | 287   | 209   | 98    | 294   |
